# Supplementary material for: Monitoring of Rice Transcriptional Responses to Contrasted Colonizing Patterns of Phytobeneficial Burkholderia s.l. Reveals a Temporal Shift in JA Systemic Response
Source: Front Plant Sci. 2019 Sep 24;10:1141. doi: 10.3389/fpls.2019.01141 (PMC6769109; doi:10.3389/fpls.2019.01141)
Supplement: Supplementary file 1 [file Table_1.docx]

| Supplementary Table 1 : Hydroponic medium | | |
| --- | --- | --- |
| **Solutions** | **Salts** | **Final concentration** |
| NH4 + Mg | (NH4)2SO4 | 0,5 mM |
| MgSO4.7H2O | 1,6 mM |
| Ca + K | Ca(NO3)2.4H2O | 1,2 mM |
| KNO3 | 0,7 mM |
| Oligo-éléments | MnSO4.H2O | 10 µM |
| (NH4)6Mo7O24.4H2O | 0,16 µM |
| ZnSO4.7H2O | 0,7 µM |
| CuSO4.5H2O | 0,8 µM |
| H3BO3 | 22,6 µM |
| FeEDTA | FeSO4.7H2O | 90 µM |
| EDTA | 90 µM |
| KH2PO4 | KH2PO4 | 0,4 mM |
| Si | CaSiO3·9H2O | 1,70 mM |
