# Supplementary material for: Monitoring of Rice Transcriptional Responses to Contrasted Colonizing Patterns of Phytobeneficial Burkholderia s.l. Reveals a Temporal Shift in JA Systemic Response
Source: Front Plant Sci. 2019 Sep 24;10:1141. doi: 10.3389/fpls.2019.01141 (PMC6769109; doi:10.3389/fpls.2019.01141)
Supplement: Supplementary file 4 [file Table_4.xls]

## Sheet: Leaves - Up
Supplementary Table 4 : Gene Ontology term enrichment analysis of commonly regulated genes by each strains
source	term_name	term_id	adjusted_p_value	negative_log10_of_adjusted_p_value	term_size	query_size	intersection_size		effective_domain_size		intersections
GO:BP	biological_process	GO:0008150	2.23574e-08	7.650578789426695	17854	976	576	0.590164	36851	0.484492	OS04G0578600,OS10G0554200,OS03G0133300,OS07G0677400,OS06G0109200,OS05G0592300,OS01G0892800,OS04G0688300,OS05G0537100,OS02G0685900,OS01G0850700,OS01G0123700,OS05G0496100,OS11G0112000,OS01G0643300,OS05G0375400,OS09G0455300,OS05G0568300,OS01G0111100,OS06G0696600,OS03G0703100,OS04G0568600,OS07G0182400,OS04G0429800,OS04G0635700,OS03G0120400,OS02G0523800,OS04G0604200,OS01G0848700,OS09G0509700,OS04G0680…
GO:BP	oxidation-reduction process	GO:0055114	1.03736e-07	6.984070343213367	2093	976	106	0.108607	36851	0.0567963	OS04G0578600,OS07G0677400,OS05G0592300,OS04G0688300,OS01G0850700,OS09G0451000,OS02G0178800,OS04G0523000,OS12G0291100,OS04G0119400,OS02G0703600,OS01G0935400,OS06G0306300,OS06G0196300,OS02G0152400,OS02G0110200,OS03G0762300,OS01G0602400,OS02G0578400,OS02G0105400,OS02G0734400,OS04G0631100,OS08G0547300,OS03G0685000,OS08G0105800,OS06G0107700,OS05G0404200,OS05G0348100,OS02G0537700,OS03G0154100,OS02G0190…
GO:BP	response to chemical	GO:0042221	1.03736e-07	6.984070343213367	1410	976	80	0.0819672	36851	0.0382622	OS10G0554200,OS07G0677400,OS04G0688300,OS02G0685900,OS01G0643300,OS05G0568300,OS07G0182400,OS09G0451000,OS04G0584600,OS03G0765400,OS07G0622000,OS06G0306300,OS06G0196300,OS02G0208100,OS01G0178500,OS06G0649000,OS09G0279500,OS03G0762300,OS03G0741100,OS11G0177400,OS04G0463400,OS04G0631100,OS07G0569100,OS05G0337400,OS02G0126400,OS02G0537700,OS03G0125000,OS03G0229500,OS12G0583900,OS09G0247700,OS01G0675…
GO:BP	metabolic process	GO:0008152	2.95023e-07	6.530144453750645	13778	976	457	0.468238	36851	0.373884	OS04G0578600,OS03G0133300,OS07G0677400,OS05G0592300,OS01G0892800,OS04G0688300,OS05G0537100,OS02G0685900,OS01G0850700,OS01G0123700,OS05G0496100,OS05G0375400,OS09G0455300,OS05G0568300,OS01G0111100,OS06G0696600,OS03G0703100,OS04G0568600,OS07G0182400,OS04G0429800,OS02G0523800,OS04G0604200,OS09G0509700,OS09G0451000,OS12G0256000,OS03G0828100,OS02G0178800,OS08G0504500,OS05G0468900,OS10G0544600,OS05G0506…
GO:BP	cellular response to chemical stimulus	GO:0070887	1.16715e-06	5.932871653167922	773	976	51	0.0522541	36851	0.0209764	OS07G0677400,OS04G0688300,OS02G0685900,OS01G0643300,OS07G0182400,OS09G0451000,OS04G0584600,OS07G0622000,OS06G0306300,OS06G0196300,OS01G0178500,OS03G0762300,OS04G0463400,OS04G0631100,OS07G0569100,OS02G0126400,OS02G0537700,OS09G0247700,OS01G0675700,OS05G0528000,OS02G0729400,OS08G0561700,OS12G0188700,OS02G0817600,OS03G0227700,OS01G0913000,OS05G0213500,OS06G0185900,OS05G0116100,OS01G0192000,OS02G0580…
GO:BP	photosynthesis	GO:0015979	1.7805e-05	4.749458790201058	212	976	22	0.022541	36851	0.0057529	OS08G0504500,OS04G0523000,OS12G0291100,OS02G0152400,OS05G0401300,OS02G0578400,OS07G0673550,OS06G0107700,OS09G0481200,OS06G0705100,OS07G0105600,OS01G0805300,OS05G0526200,OS07G0556200,OS07G0489800,OS02G0103800,OS03G0267300,OS02G0610800,OS08G0440900,OS12G0564400,OS09G0296800,OS05G0568900
GO:BP	response to salt stress	GO:0009651	3.06314e-05	4.51383332682237	169	976	19	0.0194672	36851	0.00458604	OS09G0451000,OS04G0584600,OS09G0279500,OS08G0561700,OS05G0213500,OS08G0440100,OS06G0111500,OS07G0517100,OS01G0884300,OS10G0563600,OS10G0154000,OS06G0199500,OS02G0181300,OS09G0394900,OS02G0768600,OS03G0815100,OS05G0323900,OS02G0122000,OS03G0109600
GO:BP	chloroplast rRNA processing	GO:1901259	3.06314e-05	4.51383332682237	17	976	7	0.00717213	36851	0.000461317	OS09G0279500,OS07G0631900,OS08G0557100,OS09G0565200,OS02G0115600,OS03G0376600,OS08G0308700
GO:BP	response to osmotic stress	GO:0006970	4.04418e-05	4.393169604909432	191	976	20	0.0204918	36851	0.00518303	OS09G0451000,OS04G0584600,OS09G0279500,OS03G0229500,OS08G0561700,OS05G0213500,OS08G0440100,OS06G0111500,OS07G0517100,OS01G0884300,OS10G0563600,OS10G0154000,OS06G0199500,OS02G0181300,OS09G0394900,OS02G0768600,OS03G0815100,OS05G0323900,OS02G0122000,OS03G0109600
GO:BP	NADH dehydrogenase complex (plastoquinone) assembly	GO:0010258	8.68646e-05	4.061157204930765	4	976	4	0.00409836	36851	0.000108545	OS04G0635700,OS01G0959900,OS01G0882500,OS04G0539000
GO:BP	cellular process	GO:0009987	0.000132334	3.878328220826359	13683	976	435	0.445697	36851	0.371306	OS03G0133300,OS07G0677400,OS01G0892800,OS04G0688300,OS05G0537100,OS02G0685900,OS01G0850700,OS01G0123700,OS05G0496100,OS11G0112000,OS01G0643300,OS09G0455300,OS05G0568300,OS01G0111100,OS06G0696600,OS07G0182400,OS04G0429800,OS04G0635700,OS03G0120400,OS02G0523800,OS04G0604200,OS01G0848700,OS09G0509700,OS09G0451000,OS03G0828100,OS02G0178800,OS08G0504500,OS06G0699800,OS05G0468900,OS10G0544600,OS05G0506…
GO:BP	cellular metabolic process	GO:0044237	0.000132334	3.878328220826359	11305	976	369	0.378074	36851	0.306776	OS03G0133300,OS07G0677400,OS01G0892800,OS04G0688300,OS05G0537100,OS02G0685900,OS01G0850700,OS01G0123700,OS05G0496100,OS09G0455300,OS05G0568300,OS01G0111100,OS06G0696600,OS07G0182400,OS04G0429800,OS02G0523800,OS04G0604200,OS09G0509700,OS09G0451000,OS03G0828100,OS02G0178800,OS08G0504500,OS05G0468900,OS10G0544600,OS05G0506000,OS03G0125600,OS02G0465900,OS10G0497700,OS03G0109300,OS04G0584600,OS04G0523…
GO:BP	response to abiotic stimulus	GO:0009628	0.000323421	3.4902312012010137	775	976	44	0.045082	36851	0.0210306	OS09G0451000,OS04G0584600,OS04G0523000,OS09G0279500,OS03G0741100,OS04G0631100,OS01G0286100,OS01G0202500,OS02G0606200,OS03G0229500,OS01G0710700,OS02G0729400,OS08G0561700,OS11G0521500,OS05G0213500,OS09G0553300,OS08G0440100,OS06G0111500,OS01G0589800,OS04G0493000,OS07G0517100,OS01G0884300,OS03G0854000,OS10G0563600,OS10G0154000,OS06G0199500,OS09G0541000,OS02G0181300,OS02G0170500,OS09G0394900,OS12G0570…
GO:BP	cellular response to toxic substance	GO:0097237	0.000413458	3.383568375371331	270	976	22	0.022541	36851	0.0073268	OS07G0677400,OS04G0688300,OS06G0306300,OS06G0196300,OS03G0762300,OS02G0537700,OS05G0528000,OS08G0561700,OS12G0188700,OS01G0913000,OS06G0185900,OS05G0116100,OS08G0522500,OS01G0963400,OS02G0639900,OS03G0284600,OS01G0266600,OS02G0664000,OS07G0260300,OS02G0567100,OS05G0323900,OS04G0556300
GO:BP	cellular oxidant detoxification	GO:0098869	0.000413458	3.383568375371331	268	976	22	0.022541	36851	0.00727253	OS07G0677400,OS04G0688300,OS06G0306300,OS06G0196300,OS03G0762300,OS02G0537700,OS05G0528000,OS08G0561700,OS12G0188700,OS01G0913000,OS06G0185900,OS05G0116100,OS08G0522500,OS01G0963400,OS02G0639900,OS03G0284600,OS01G0266600,OS02G0664000,OS07G0260300,OS02G0567100,OS05G0323900,OS04G0556300
GO:BP	cellular detoxification	GO:1990748	0.000413458	3.383568375371331	270	976	22	0.022541	36851	0.0073268	OS07G0677400,OS04G0688300,OS06G0306300,OS06G0196300,OS03G0762300,OS02G0537700,OS05G0528000,OS08G0561700,OS12G0188700,OS01G0913000,OS06G0185900,OS05G0116100,OS08G0522500,OS01G0963400,OS02G0639900,OS03G0284600,OS01G0266600,OS02G0664000,OS07G0260300,OS02G0567100,OS05G0323900,OS04G0556300
GO:BP	translation	GO:0006412	0.000430393	3.366134699503173	792	976	44	0.045082	36851	0.021492	OS05G0496100,OS05G0568300,OS03G0828100,OS11G0550800,OS03G0265400,OS03G0815400,OS01G0662300,OS02G0754300,OS05G0186000,OS02G0652600,OS01G0805000,OS03G0125000,OS07G0570700,OS01G0678600,OS01G0749200,OS03G0769100,OS04G0461100,OS03G0284400,OS01G0667100,OS06G0647100,OS04G0691600,OS07G0587400,OS03G0122200,OS11G0425800,OS03G0196800,OS08G0440300,OS08G0360100,OS01G0372700,OS12G0124200,OS05G0140500,OS09G0416…
GO:BP	amide biosynthetic process	GO:0043604	0.000472004	3.326054600083166	875	976	47	0.0481557	36851	0.0237443	OS05G0496100,OS05G0568300,OS03G0828100,OS04G0119400,OS11G0550800,OS03G0265400,OS03G0815400,OS01G0662300,OS02G0754300,OS05G0186000,OS02G0652600,OS01G0805000,OS03G0125000,OS07G0570700,OS01G0678600,OS01G0749200,OS03G0769100,OS04G0461100,OS03G0284400,OS01G0667100,OS06G0647100,OS04G0691600,OS07G0587400,OS03G0122200,OS11G0425800,OS03G0196800,OS08G0440300,OS08G0360100,OS01G0372700,OS12G0124200,OS05G0140…
GO:BP	cellular amide metabolic process	GO:0043603	0.000536864	3.270135645586941	1069	976	54	0.0553279	36851	0.0290087	OS05G0496100,OS05G0568300,OS03G0828100,OS02G0465900,OS04G0119400,OS11G0550800,OS03G0265400,OS03G0815400,OS01G0662300,OS02G0754300,OS05G0186000,OS02G0652600,OS01G0805000,OS03G0125000,OS07G0570700,OS01G0678600,OS01G0749200,OS03G0769100,OS04G0461100,OS03G0284400,OS01G0667100,OS06G0647100,OS04G0691600,OS07G0587400,OS03G0122200,OS11G0425800,OS03G0196800,OS08G0440300,OS08G0360100,OS05G0116100,OS01G0372…
GO:BP	peptide metabolic process	GO:0006518	0.000589348	3.229627937283432	941	976	49	0.0502049	36851	0.0255353	OS05G0496100,OS05G0568300,OS03G0828100,OS02G0465900,OS11G0550800,OS03G0265400,OS03G0815400,OS01G0662300,OS02G0754300,OS05G0186000,OS02G0652600,OS01G0805000,OS03G0125000,OS07G0570700,OS01G0678600,OS01G0749200,OS03G0769100,OS04G0461100,OS03G0284400,OS01G0667100,OS06G0647100,OS04G0691600,OS07G0587400,OS03G0122200,OS11G0425800,OS03G0196800,OS08G0440300,OS08G0360100,OS05G0116100,OS01G0372700,OS07G0622…
GO:BP	peptide biosynthetic process	GO:0043043	0.000589348	3.229627937283432	808	976	44	0.045082	36851	0.0219261	OS05G0496100,OS05G0568300,OS03G0828100,OS11G0550800,OS03G0265400,OS03G0815400,OS01G0662300,OS02G0754300,OS05G0186000,OS02G0652600,OS01G0805000,OS03G0125000,OS07G0570700,OS01G0678600,OS01G0749200,OS03G0769100,OS04G0461100,OS03G0284400,OS01G0667100,OS06G0647100,OS04G0691600,OS07G0587400,OS03G0122200,OS11G0425800,OS03G0196800,OS08G0440300,OS08G0360100,OS01G0372700,OS12G0124200,OS05G0140500,OS09G0416…
GO:BP	response to hormone	GO:0009725	0.000607509	3.2164471079910397	632	976	37	0.0379098	36851	0.0171501	OS02G0685900,OS01G0643300,OS07G0182400,OS09G0451000,OS04G0584600,OS07G0622000,OS01G0178500,OS11G0177400,OS07G0569100,OS05G0337400,OS02G0126400,OS03G0125000,OS03G0229500,OS09G0247700,OS01G0675700,OS02G0817600,OS03G0227700,OS11G0521500,OS05G0213500,OS08G0440100,OS01G0192000,OS06G0111500,OS02G0580300,OS03G0701700,OS10G0563600,OS09G0541000,OS05G0178600,OS02G0181300,OS01G0741900,OS03G0267300,OS03G0742…
GO:BP	response to oxidative stress	GO:0006979	0.000672438	3.172347982880279	328	976	24	0.0245902	36851	0.00890071	OS07G0677400,OS04G0688300,OS09G0451000,OS06G0306300,OS03G0762300,OS05G0404200,OS02G0537700,OS08G0561700,OS12G0188700,OS01G0913000,OS06G0185900,OS08G0440100,OS07G0517100,OS06G0472000,OS10G0563600,OS08G0522500,OS01G0963400,OS02G0639900,OS03G0360700,OS01G0266600,OS02G0664000,OS02G0567100,OS05G0323900,OS04G0556300
GO:BP	response to acid chemical	GO:0001101	0.00069286	3.1593546053517416	420	976	28	0.0286885	36851	0.0113972	OS10G0554200,OS02G0685900,OS09G0451000,OS04G0584600,OS07G0622000,OS09G0279500,OS03G0741100,OS11G0177400,OS04G0631100,OS07G0569100,OS02G0126400,OS03G0229500,OS08G0561700,OS03G0227700,OS05G0213500,OS08G0440100,OS01G0192000,OS06G0111500,OS02G0580300,OS01G0884300,OS09G0541000,OS02G0181300,OS09G0394900,OS03G0815100,OS07G0568600,OS04G0635800,OS02G0122000,OS07G0161600
GO:BP	response to endogenous stimulus	GO:0009719	0.000730747	3.136233196010655	641	976	37	0.0379098	36851	0.0173944	OS02G0685900,OS01G0643300,OS07G0182400,OS09G0451000,OS04G0584600,OS07G0622000,OS01G0178500,OS11G0177400,OS07G0569100,OS05G0337400,OS02G0126400,OS03G0125000,OS03G0229500,OS09G0247700,OS01G0675700,OS02G0817600,OS03G0227700,OS11G0521500,OS05G0213500,OS08G0440100,OS01G0192000,OS06G0111500,OS02G0580300,OS03G0701700,OS10G0563600,OS09G0541000,OS05G0178600,OS02G0181300,OS01G0741900,OS03G0267300,OS03G0742…
GO:BP	photosynthesis, light reaction	GO:0019684	0.000849645	3.070762507571743	99	976	12	0.0122951	36851	0.00268649	OS04G0523000,OS02G0578400,OS09G0481200,OS06G0705100,OS07G0105600,OS05G0526200,OS07G0489800,OS03G0267300,OS02G0610800,OS08G0440900,OS09G0296800,OS05G0568900
GO:BP	organic substance metabolic process	GO:0071704	0.00101325	2.9942835251141195	11699	976	371	0.380123	36851	0.317468	OS03G0133300,OS01G0892800,OS05G0537100,OS02G0685900,OS01G0850700,OS01G0123700,OS05G0496100,OS05G0375400,OS09G0455300,OS05G0568300,OS01G0111100,OS06G0696600,OS03G0703100,OS04G0568600,OS07G0182400,OS04G0429800,OS02G0523800,OS04G0604200,OS09G0509700,OS09G0451000,OS03G0828100,OS02G0178800,OS05G0468900,OS10G0544600,OS05G0506000,OS03G0125600,OS02G0465900,OS10G0497700,OS03G0109300,OS04G0584600,OS12G0291…
GO:BP	response to water deprivation	GO:0009414	0.00174638	2.7578622697712203	125	976	13	0.0133197	36851	0.00339204	OS04G0584600,OS09G0279500,OS03G0741100,OS04G0631100,OS05G0213500,OS08G0440100,OS06G0111500,OS01G0884300,OS09G0541000,OS02G0181300,OS09G0394900,OS03G0815100,OS04G0635800
GO:BP	response to inorganic substance	GO:0010035	0.00174638	2.7578622697712203	307	976	22	0.022541	36851	0.00833085	OS10G0554200,OS09G0451000,OS04G0584600,OS09G0279500,OS03G0741100,OS04G0463400,OS04G0631100,OS02G0729400,OS08G0561700,OS05G0213500,OS08G0440100,OS06G0111500,OS07G0517100,OS01G0884300,OS09G0541000,OS02G0181300,OS09G0394900,OS02G0768600,OS03G0815100,OS05G0323900,OS04G0635800,OS05G0295800
GO:BP	iron-sulfur cluster assembly	GO:0016226	0.00174638	2.7578622697712203	35	976	7	0.00717213	36851	0.000949771	OS11G0704600,OS09G0338400,OS06G0146400,OS01G0733600,OS04G0674400,OS03G0775500,OS01G0662600
GO:BP	cell redox homeostasis	GO:0045454	0.00174638	2.7578622697712203	144	976	14	0.0143443	36851	0.00390763	OS06G0196300,OS02G0537700,OS12G0188700,OS01G0913000,OS08G0412401,OS05G0200100,OS01G0963400,OS02G0639900,OS10G0482900,OS01G0266600,OS07G0260300,OS02G0567100,OS12G0175500,OS08G0558200
GO:BP	detoxification	GO:0098754	0.00201371	2.696002439994492	314	976	22	0.022541	36851	0.0085208	OS07G0677400,OS04G0688300,OS06G0306300,OS06G0196300,OS03G0762300,OS02G0537700,OS05G0528000,OS08G0561700,OS12G0188700,OS01G0913000,OS06G0185900,OS05G0116100,OS08G0522500,OS01G0963400,OS02G0639900,OS03G0284600,OS01G0266600,OS02G0664000,OS07G0260300,OS02G0567100,OS05G0323900,OS04G0556300
GO:BP	response to toxic substance	GO:0009636	0.00201371	2.696002439994492	360	976	24	0.0245902	36851	0.00976907	OS07G0677400,OS04G0688300,OS06G0306300,OS06G0196300,OS03G0762300,OS02G0537700,OS05G0528000,OS08G0561700,OS12G0188700,OS01G0913000,OS06G0185900,OS08G0440100,OS05G0116100,OS07G0517100,OS08G0522500,OS01G0963400,OS02G0639900,OS03G0284600,OS01G0266600,OS02G0664000,OS07G0260300,OS02G0567100,OS05G0323900,OS04G0556300
GO:BP	cellular response to oxidative stress	GO:0034599	0.00267135	2.573269469374088	81	976	10	0.0102459	36851	0.00219804	OS09G0451000,OS08G0561700,OS12G0188700,OS01G0913000,OS10G0563600,OS01G0963400,OS02G0639900,OS01G0266600,OS02G0567100,OS05G0323900
GO:BP	cellular component biogenesis	GO:0044085	0.00267135	2.573269469374088	1218	976	56	0.057377	36851	0.033052	OS11G0112000,OS06G0696600,OS04G0635700,OS04G0604200,OS06G0699800,OS10G0497700,OS09G0279500,OS07G0631900,OS07G0520800,OS01G0911000,OS08G0557100,OS03G0125000,OS04G0462600,OS03G0769100,OS03G0284400,OS09G0565200,OS01G0959900,OS01G0882500,OS04G0539000,OS05G0526200,OS03G0122200,OS02G0498700,OS06G0645700,OS11G0704600,OS09G0338400,OS02G0580300,OS02G0115600,OS12G0124200,OS09G0493500,OS06G0146400,OS07G0517…
GO:BP	response to organic substance	GO:0010033	0.00269504	2.5694355016045285	775	976	40	0.0409836	36851	0.0210306	OS02G0685900,OS01G0643300,OS07G0182400,OS09G0451000,OS04G0584600,OS07G0622000,OS01G0178500,OS06G0649000,OS11G0177400,OS07G0569100,OS05G0337400,OS02G0126400,OS03G0125000,OS03G0229500,OS09G0247700,OS01G0675700,OS08G0561700,OS02G0817600,OS03G0227700,OS11G0521500,OS05G0213500,OS08G0440100,OS01G0192000,OS06G0111500,OS02G0580300,OS03G0701700,OS10G0563600,OS09G0541000,OS05G0178600,OS02G0181300,OS01G0741…
GO:BP	response to light stimulus	GO:0009416	0.00277822	2.5562334195238887	324	976	22	0.022541	36851	0.00879216	OS01G0286100,OS01G0202500,OS02G0606200,OS03G0229500,OS01G0710700,OS02G0729400,OS08G0561700,OS11G0521500,OS09G0553300,OS08G0440100,OS01G0589800,OS04G0493000,OS10G0563600,OS02G0170500,OS09G0394900,OS12G0570000,OS08G0137200,OS03G0695500,OS02G0610800,OS05G0275700,OS08G0440900,OS09G0296800
GO:BP	NADH dehydrogenase complex assembly	GO:0010257	0.00277822	2.5562334195238887	17	976	5	0.00512295	36851	0.000461317	OS04G0635700,OS01G0959900,OS01G0882500,OS04G0539000,OS05G0533700
GO:BP	hormone-mediated signaling pathway	GO:0009755	0.00287623	2.541177104170695	372	976	24	0.0245902	36851	0.0100947	OS02G0685900,OS01G0643300,OS07G0182400,OS04G0584600,OS07G0622000,OS01G0178500,OS07G0569100,OS02G0126400,OS09G0247700,OS01G0675700,OS02G0817600,OS03G0227700,OS05G0213500,OS01G0192000,OS02G0580300,OS03G0701700,OS05G0178600,OS02G0181300,OS01G0741900,OS03G0742900,OS06G0547900,OS07G0568600,OS05G0230700,OS07G0161600
GO:BP	protein repair	GO:0030091	0.00342474	2.4653719102791576	18	976	5	0.00512295	36851	0.000488454	OS05G0404200,OS06G0705100,OS06G0472000,OS03G0360700,OS05G0568900
GO:BP	gene expression	GO:0010467	0.00342474	2.4653719102791576	3897	976	141	0.144467	36851	0.10575	OS05G0537100,OS05G0496100,OS09G0455300,OS05G0568300,OS07G0182400,OS03G0828100,OS03G0796900,OS11G0550800,OS02G0731700,OS01G0900800,OS04G0493100,OS01G0178500,OS06G0649000,OS11G0248200,OS09G0279500,OS07G0631900,OS03G0265400,OS03G0815400,OS01G0662300,OS03G0741100,OS02G0754300,OS01G0911000,OS05G0186000,OS02G0652600,OS12G0225100,OS10G0181200,OS03G0711100,OS05G0447700,OS01G0286100,OS01G0805000,OS02G0806…
GO:BP	photosynthetic electron transport chain	GO:0009767	0.00429407	2.3671312145411147	42	976	7	0.00717213	36851	0.00113972	OS04G0523000,OS02G0578400,OS09G0481200,OS07G0105600,OS07G0489800,OS03G0267300,OS08G0440900
GO:BP	response to oxygen-containing compound	GO:1901700	0.00429407	2.3671312145411147	585	976	32	0.0327869	36851	0.0158747	OS10G0554200,OS02G0685900,OS09G0451000,OS04G0584600,OS07G0622000,OS06G0649000,OS09G0279500,OS03G0741100,OS11G0177400,OS04G0631100,OS07G0569100,OS02G0126400,OS03G0229500,OS08G0561700,OS03G0227700,OS05G0213500,OS08G0440100,OS01G0192000,OS06G0111500,OS02G0580300,OS07G0517100,OS01G0884300,OS09G0541000,OS02G0181300,OS09G0394900,OS03G0815100,OS06G0547900,OS07G0568600,OS05G0323900,OS04G0635800,OS02G0122…
GO:BP	ion transport	GO:0006811	0.00441627	2.3549448709489016	995	976	47	0.0481557	36851	0.0270006	OS10G0554200,OS05G0568300,OS03G0120400,OS02G0184200,OS04G0691400,OS05G0205000,OS02G0700500,OS01G0871500,OS02G0208100,OS07G0559700,OS02G0750100,OS11G0177400,OS04G0463400,OS07G0669650,OS04G0631100,OS06G0644200,OS01G0825800,OS06G0143700,OS05G0337400,OS08G0300300,OS01G0588200,OS05G0231700,OS03G0195450,OS04G0470700,OS03G0229500,OS12G0583900,OS06G0560000,OS01G0871900,OS04G0565500,OS06G0581000,OS03G0751…
GO:BP	electron transport chain	GO:0022900	0.00583326	2.2340889704232056	275	976	19	0.0194672	36851	0.00746248	OS04G0523000,OS02G0578400,OS03G0685000,OS09G0481200,OS07G0105600,OS09G0249900,OS07G0556200,OS07G0489800,OS11G0704600,OS08G0161700,OS03G0772800,OS10G0482900,OS05G0555300,OS03G0267300,OS04G0674400,OS11G0528300,OS08G0440900,OS12G0175500,OS08G0558200
GO:BP	response to radiation	GO:0009314	0.00585421	2.2325317267153513	346	976	22	0.022541	36851	0.00938916	OS01G0286100,OS01G0202500,OS02G0606200,OS03G0229500,OS01G0710700,OS02G0729400,OS08G0561700,OS11G0521500,OS09G0553300,OS08G0440100,OS01G0589800,OS04G0493000,OS10G0563600,OS02G0170500,OS09G0394900,OS12G0570000,OS08G0137200,OS03G0695500,OS02G0610800,OS05G0275700,OS08G0440900,OS09G0296800
GO:BP	multicellular organism development	GO:0007275	0.00585421	2.2325317267153513	953	976	45	0.0461066	36851	0.0258609	OS01G0123700,OS06G0696600,OS09G0451000,OS07G0622000,OS02G0703600,OS09G0279500,OS01G0202500,OS02G0606200,OS07G0570700,OS03G0229500,OS09G0247700,OS06G0717200,OS08G0299200,OS02G0729400,OS06G0654900,OS03G0227700,OS05G0101600,OS05G0213500,OS08G0440100,OS01G0192000,OS07G0622900,OS09G0493500,OS04G0493000,OS01G0884300,OS12G0514400,OS03G0794900,OS02G0550600,OS09G0541000,OS02G0170500,OS09G0394900,OS12G0570…
GO:BP	cellular response to hormone stimulus	GO:0032870	0.00634389	2.1976441499838075	397	976	24	0.0245902	36851	0.0107731	OS02G0685900,OS01G0643300,OS07G0182400,OS04G0584600,OS07G0622000,OS01G0178500,OS07G0569100,OS02G0126400,OS09G0247700,OS01G0675700,OS02G0817600,OS03G0227700,OS05G0213500,OS01G0192000,OS02G0580300,OS03G0701700,OS05G0178600,OS02G0181300,OS01G0741900,OS03G0742900,OS06G0547900,OS07G0568600,OS05G0230700,OS07G0161600
GO:BP	multicellular organismal process	GO:0032501	0.00757438	2.1206527118867866	1139	976	51	0.0522541	36851	0.0309083	OS01G0123700,OS06G0696600,OS09G0451000,OS03G0765400,OS07G0622000,OS02G0703600,OS01G0784700,OS09G0279500,OS10G0101000,OS01G0202500,OS02G0606200,OS03G0221700,OS04G0419900,OS07G0570700,OS03G0229500,OS09G0247700,OS06G0717200,OS08G0299200,OS02G0729400,OS06G0654900,OS03G0751100,OS03G0227700,OS05G0101600,OS05G0213500,OS08G0440100,OS01G0192000,OS07G0622900,OS09G0493500,OS04G0493000,OS01G0884300,OS12G0514…
GO:BP	ion transmembrane transport	GO:0034220	0.00839767	2.075840980749754	721	976	36	0.0368852	36851	0.0195653	OS02G0184200,OS04G0691400,OS05G0205000,OS02G0700500,OS01G0871500,OS07G0559700,OS02G0750100,OS04G0463400,OS07G0669650,OS06G0644200,OS01G0825800,OS06G0143700,OS08G0300300,OS01G0588200,OS05G0231700,OS03G0195450,OS04G0470700,OS03G0229500,OS12G0583900,OS06G0560000,OS01G0871900,OS04G0565500,OS06G0581000,OS03G0594400,OS04G0643600,OS02G0817500,OS07G0131600,OS03G0772800,OS01G0945300,OS09G0541000,OS05G0536…
GO:BP	cellular response to endogenous stimulus	GO:0071495	0.00839767	2.075840980749754	406	976	24	0.0245902	36851	0.0110173	OS02G0685900,OS01G0643300,OS07G0182400,OS04G0584600,OS07G0622000,OS01G0178500,OS07G0569100,OS02G0126400,OS09G0247700,OS01G0675700,OS02G0817600,OS03G0227700,OS05G0213500,OS01G0192000,OS02G0580300,OS03G0701700,OS05G0178600,OS02G0181300,OS01G0741900,OS03G0742900,OS06G0547900,OS07G0568600,OS05G0230700,OS07G0161600
GO:BP	generation of precursor metabolites and energy	GO:0006091	0.00856642	2.0672008066412535	509	976	28	0.0286885	36851	0.0138124	OS04G0523000,OS04G0119400,OS02G0578400,OS03G0685000,OS09G0481200,OS06G0705100,OS07G0105600,OS05G0526200,OS04G0390000,OS09G0249900,OS07G0556200,OS07G0489800,OS11G0704600,OS08G0161700,OS03G0772800,OS09G0382500,OS10G0482900,OS05G0533700,OS05G0555300,OS03G0267300,OS02G0610800,OS04G0674400,OS11G0528300,OS08G0440900,OS12G0175500,OS08G0558200,OS09G0296800,OS05G0568900
GO:BP	response to red or far red light	GO:0009639	0.00860853	2.0650710188288053	80	976	9	0.00922131	36851	0.0021709	OS01G0286100,OS01G0202500,OS02G0606200,OS02G0729400,OS04G0493000,OS09G0394900,OS02G0610800,OS05G0275700,OS09G0296800
GO:BP	organonitrogen compound metabolic process	GO:1901564	0.00902167	2.044713167773294	6251	976	207	0.21209	36851	0.169629	OS01G0892800,OS02G0685900,OS01G0123700,OS05G0496100,OS05G0568300,OS01G0111100,OS04G0429800,OS03G0828100,OS02G0178800,OS05G0468900,OS10G0544600,OS05G0506000,OS03G0125600,OS02G0465900,OS03G0109300,OS04G0584600,OS02G0605900,OS04G0119400,OS05G0427200,OS07G0680900,OS11G0550800,OS07G0622000,OS03G0857900,OS09G0411650,OS01G0727800,OS03G0281500,OS01G0784700,OS02G0750100,OS02G0787300,OS03G0265400,OS03G0815…
GO:BP	cellular response to organic substance	GO:0071310	0.0100185	1.9991987460624385	464	976	26	0.0266393	36851	0.0125912	OS02G0685900,OS01G0643300,OS07G0182400,OS09G0451000,OS04G0584600,OS07G0622000,OS01G0178500,OS07G0569100,OS02G0126400,OS09G0247700,OS01G0675700,OS08G0561700,OS02G0817600,OS03G0227700,OS05G0213500,OS01G0192000,OS02G0580300,OS03G0701700,OS05G0178600,OS02G0181300,OS01G0741900,OS03G0742900,OS06G0547900,OS07G0568600,OS05G0230700,OS07G0161600
GO:BP	photomorphogenesis	GO:0009640	0.0102745	1.9882381497726254	36	976	6	0.00614754	36851	0.000976907	OS01G0202500,OS02G0606200,OS02G0729400,OS04G0493000,OS02G0610800,OS05G0275700
GO:BP	primary root development	GO:0080022	0.0103275	1.9860040991359782	6	976	3	0.00307377	36851	0.000162818	OS06G0696600,OS02G0550600,OS11G0528300
GO:BP	post-embryonic development	GO:0009791	0.0103275	1.9860040991359782	518	976	28	0.0286885	36851	0.0140566	OS09G0451000,OS07G0622000,OS09G0279500,OS01G0202500,OS02G0606200,OS07G0570700,OS06G0717200,OS02G0729400,OS06G0654900,OS05G0213500,OS08G0440100,OS07G0622900,OS04G0493000,OS12G0514400,OS03G0794900,OS02G0550600,OS02G0170500,OS12G0570000,OS08G0137200,OS04G0347600,OS01G0733600,OS02G0610800,OS02G0327100,OS05G0275700,OS07G0173200,OS09G0123200,OS05G0323900,OS04G0635800
GO:BP	transmembrane transport	GO:0055085	0.0106722	1.9717457532056382	1373	976	58	0.0594262	36851	0.0372581	OS10G0554200,OS06G0109200,OS01G0643300,OS02G0184200,OS04G0691400,OS05G0205000,OS06G0484500,OS02G0700500,OS01G0871500,OS07G0559700,OS08G0410500,OS02G0750100,OS11G0177400,OS04G0463400,OS07G0669650,OS04G0631100,OS06G0644200,OS02G0190000,OS01G0825800,OS06G0143700,OS08G0300300,OS01G0588200,OS05G0231700,OS03G0195450,OS04G0470700,OS03G0229500,OS12G0583900,OS06G0560000,OS05G0406000,OS01G0871900,OS05G0241…
GO:BP	response to stimulus	GO:0050896	0.0116785	1.93261211292972	3942	976	138	0.141393	36851	0.106971	OS10G0554200,OS07G0677400,OS01G0892800,OS04G0688300,OS02G0685900,OS01G0643300,OS05G0568300,OS07G0182400,OS01G0848700,OS04G0680800,OS09G0451000,OS03G0400700,OS05G0506000,OS03G0125600,OS01G0256500,OS04G0584600,OS04G0523000,OS03G0133400,OS02G0605900,OS07G0680900,OS12G0552400,OS03G0765400,OS07G0622000,OS06G0306300,OS06G0196300,OS02G0208100,OS01G0178500,OS02G0787300,OS02G0110200,OS06G0649000,OS09G0279…
GO:BP	anatomical structure development	GO:0048856	0.0122341	1.9124289139087336	1086	976	48	0.0491803	36851	0.02947	OS01G0123700,OS06G0696600,OS09G0451000,OS03G0765400,OS07G0622000,OS02G0703600,OS09G0279500,OS01G0202500,OS02G0606200,OS07G0570700,OS03G0229500,OS09G0247700,OS06G0717200,OS08G0299200,OS02G0729400,OS06G0654900,OS03G0227700,OS05G0101600,OS05G0213500,OS08G0440100,OS01G0192000,OS07G0622900,OS09G0493500,OS10G0580800,OS04G0493000,OS01G0884300,OS12G0514400,OS03G0794900,OS02G0550600,OS09G0541000,OS02G0170…
GO:BP	cellular response to acid chemical	GO:0071229	0.0140435	1.8525241108787451	210	976	15	0.0153689	36851	0.00569862	OS02G0685900,OS09G0451000,OS04G0584600,OS07G0622000,OS04G0631100,OS07G0569100,OS02G0126400,OS08G0561700,OS03G0227700,OS05G0213500,OS01G0192000,OS02G0580300,OS02G0181300,OS07G0568600,OS07G0161600
GO:BP	auxin-activated signaling pathway	GO:0009734	0.0140435	1.8525241108787451	106	976	10	0.0102459	36851	0.00287645	OS01G0643300,OS07G0182400,OS01G0178500,OS09G0247700,OS01G0675700,OS02G0817600,OS05G0178600,OS01G0741900,OS03G0742900,OS05G0230700
GO:BP	regulation of response to osmotic stress	GO:0047484	0.0141551	1.8490872570658476	26	976	5	0.00512295	36851	0.000705544	OS04G0584600,OS09G0279500,OS08G0440100,OS01G0884300,OS03G0815100
GO:BP	cellular response to auxin stimulus	GO:0071365	0.0158056	1.801189489999481	108	976	10	0.0102459	36851	0.00293072	OS01G0643300,OS07G0182400,OS01G0178500,OS09G0247700,OS01G0675700,OS02G0817600,OS05G0178600,OS01G0741900,OS03G0742900,OS05G0230700
GO:BP	primary metabolic process	GO:0044238	0.0168679	1.7729388499641794	11119	976	341	0.349385	36851	0.301729	OS03G0133300,OS01G0892800,OS05G0537100,OS02G0685900,OS01G0123700,OS05G0496100,OS05G0375400,OS09G0455300,OS05G0568300,OS01G0111100,OS06G0696600,OS03G0703100,OS07G0182400,OS04G0429800,OS04G0604200,OS09G0509700,OS03G0828100,OS02G0178800,OS05G0468900,OS10G0544600,OS05G0506000,OS03G0125600,OS10G0497700,OS04G0584600,OS12G0291100,OS02G0605900,OS04G0119400,OS05G0427200,OS07G0680900,OS01G0332100,OS03G0796…
GO:BP	nucleoid organization	GO:0090143	0.0177792	1.7500874149043015	2	976	2	0.00204918	36851	5.42726e-05	OS03G0178200,OS07G0185300
GO:BP	glycerol ether metabolic process	GO:0006662	0.018837	1.7249889094470061	28	976	5	0.00512295	36851	0.000759817	OS12G0188700,OS01G0913000,OS01G0963400,OS02G0639900,OS02G0567100
GO:BP	transport	GO:0006810	0.0194969	1.7100341971551651	2555	976	94	0.0963115	36851	0.0693333	OS10G0554200,OS06G0109200,OS01G0643300,OS05G0568300,OS03G0120400,OS01G0848700,OS02G0184200,OS04G0691400,OS05G0205000,OS06G0484500,OS02G0700500,OS01G0871500,OS03G0765400,OS02G0208100,OS07G0559700,OS08G0410500,OS02G0750100,OS04G0405100,OS07G0520800,OS11G0177400,OS04G0463400,OS07G0669650,OS04G0631100,OS06G0644200,OS02G0190000,OS01G0825800,OS06G0143700,OS05G0337400,OS08G0300300,OS01G0588200,OS05G0231…
GO:BP	cellular component assembly	GO:0022607	0.0194969	1.7100341971551651	769	976	36	0.0368852	36851	0.0208678	OS11G0112000,OS04G0635700,OS06G0699800,OS10G0497700,OS07G0520800,OS03G0125000,OS04G0462600,OS01G0959900,OS01G0882500,OS04G0539000,OS05G0526200,OS03G0122200,OS06G0645700,OS11G0704600,OS09G0338400,OS02G0580300,OS09G0493500,OS06G0146400,OS07G0517100,OS06G0199500,OS02G0107000,OS05G0533700,OS02G0246300,OS01G0733600,OS03G0408500,OS01G0858500,OS02G0199900,OS02G0610800,OS04G0674400,OS03G0390600,OS11G0528…
GO:BP	small molecule metabolic process	GO:0044281	0.0215634	1.666283561998184	1580	976	63	0.0645492	36851	0.0428754	OS04G0429800,OS02G0523800,OS05G0506000,OS04G0119400,OS02G0703600,OS02G0750100,OS02G0110200,OS02G0105400,OS08G0113100,OS12G0605800,OS12G0520200,OS04G0669600,OS02G0302200,OS02G0190600,OS04G0306400,OS05G0516300,OS07G0406300,OS09G0481200,OS02G0823400,OS12G0188700,OS04G0669800,OS09G0492700,OS08G0484500,OS07G0622200,OS04G0390000,OS11G0521500,OS01G0913000,OS12G0233300,OS10G0523700,OS05G0116100,OS03G0231…
GO:BP	biosynthetic process	GO:0009058	0.0218482	1.6605834995646727	5216	976	173	0.177254	36851	0.141543	OS05G0537100,OS05G0496100,OS09G0455300,OS05G0568300,OS07G0182400,OS04G0429800,OS02G0523800,OS09G0509700,OS09G0451000,OS03G0828100,OS02G0178800,OS05G0506000,OS10G0497700,OS03G0109300,OS12G0291100,OS04G0119400,OS05G0427200,OS03G0796900,OS11G0550800,OS02G0731700,OS02G0703600,OS01G0935400,OS01G0900800,OS03G0857900,OS04G0493100,OS01G0178500,OS02G0750100,OS06G0649000,OS03G0265400,OS03G0815400,OS01G0662…
GO:BP	response to lipid	GO:0033993	0.0218585	1.6603800737822345	294	976	18	0.0184426	36851	0.00797807	OS02G0685900,OS09G0451000,OS04G0584600,OS07G0622000,OS11G0177400,OS07G0569100,OS02G0126400,OS03G0229500,OS03G0227700,OS05G0213500,OS06G0111500,OS02G0580300,OS09G0541000,OS02G0181300,OS06G0547900,OS07G0568600,OS02G0122000,OS07G0161600
GO:BP	plastid organization	GO:0009657	0.0271927	1.5655471678665591	182	976	13	0.0133197	36851	0.00493881	OS05G0506000,OS06G0506000,OS07G0520800,OS05G0186000,OS03G0178200,OS07G0570700,OS12G0188700,OS04G0691600,OS10G0580800,OS08G0308700,OS07G0185300,OS02G0610800,OS06G0136800
GO:BP	establishment of localization	GO:0051234	0.0277534	1.5566844203417727	2590	976	94	0.0963115	36851	0.070283	OS10G0554200,OS06G0109200,OS01G0643300,OS05G0568300,OS03G0120400,OS01G0848700,OS02G0184200,OS04G0691400,OS05G0205000,OS06G0484500,OS02G0700500,OS01G0871500,OS03G0765400,OS02G0208100,OS07G0559700,OS08G0410500,OS02G0750100,OS04G0405100,OS07G0520800,OS11G0177400,OS04G0463400,OS07G0669650,OS04G0631100,OS06G0644200,OS02G0190000,OS01G0825800,OS06G0143700,OS05G0337400,OS08G0300300,OS01G0588200,OS05G0231…
GO:BP	plastid translation	GO:0032544	0.0306468	1.513614635483147	9	976	3	0.00307377	36851	0.000244227	OS05G0186000,OS07G0570700,OS04G0691600
GO:BP	response to abscisic acid	GO:0009737	0.0319653	1.4953205775173126	209	976	14	0.0143443	36851	0.00567149	OS02G0685900,OS04G0584600,OS07G0622000,OS11G0177400,OS07G0569100,OS02G0126400,OS03G0229500,OS05G0213500,OS06G0111500,OS09G0541000,OS02G0181300,OS07G0568600,OS02G0122000,OS07G0161600
GO:BP	cellular homeostasis	GO:0019725	0.032549	1.4874621939995873	357	976	20	0.0204918	36851	0.00968766	OS03G0120400,OS06G0196300,OS04G0463400,OS02G0537700,OS12G0188700,OS03G0751100,OS01G0913000,OS08G0440100,OS08G0412401,OS05G0200100,OS01G0963400,OS02G0639900,OS10G0482900,OS01G0266600,OS07G0260300,OS02G0567100,OS02G0673600,OS12G0175500,OS08G0558200,OS01G0662600
GO:BP	organonitrogen compound biosynthetic process	GO:1901566	0.0340782	1.4675229054156662	1680	976	65	0.0665984	36851	0.045589	OS05G0496100,OS05G0568300,OS04G0429800,OS03G0828100,OS02G0178800,OS05G0506000,OS04G0119400,OS05G0427200,OS11G0550800,OS02G0750100,OS03G0265400,OS03G0815400,OS01G0662300,OS02G0754300,OS05G0186000,OS02G0652600,OS01G0805000,OS03G0125000,OS07G0570700,OS01G0678600,OS01G0749200,OS03G0769100,OS04G0461100,OS03G0284400,OS01G0667100,OS04G0669800,OS06G0647100,OS08G0484500,OS04G0691600,OS07G0587400,OS07G0622…
GO:BP	positive regulation of response to salt stress	GO:1901002	0.0356987	1.4473479921011192	20	976	4	0.00409836	36851	0.000542726	OS04G0584600,OS08G0440100,OS01G0884300,OS03G0815100
GO:BP	cellular biosynthetic process	GO:0044249	0.0371434	1.4301179563824422	4810	976	159	0.16291	36851	0.130526	OS05G0537100,OS05G0496100,OS09G0455300,OS05G0568300,OS07G0182400,OS04G0429800,OS09G0509700,OS09G0451000,OS03G0828100,OS02G0178800,OS05G0506000,OS10G0497700,OS03G0109300,OS04G0119400,OS05G0427200,OS03G0796900,OS11G0550800,OS02G0731700,OS01G0935400,OS01G0900800,OS03G0857900,OS04G0493100,OS01G0178500,OS02G0750100,OS06G0649000,OS03G0265400,OS03G0815400,OS01G0662300,OS08G0113100,OS03G0741100,OS02G0754…
GO:BP	iron ion homeostasis	GO:0055072	0.0387186	1.412080578689658	34	976	5	0.00512295	36851	0.000922634	OS04G0463400,OS03G0229500,OS03G0751100,OS03G0208500,OS01G0662600
GO:BP	protein stabilization	GO:0050821	0.0387321	1.4119284219232862	10	976	3	0.00307377	36851	0.000271363	OS02G0651300,OS09G0481200,OS06G0724400
GO:BP	regulation of biological quality	GO:0065008	0.0387321	1.4119284219232862	986	976	42	0.0430328	36851	0.0267564	OS01G0643300,OS03G0120400,OS09G0451000,OS03G0109300,OS02G0703600,OS01G0935400,OS03G0857900,OS06G0196300,OS04G0463400,OS10G0181200,OS02G0537700,OS03G0229500,OS09G0247700,OS02G0651300,OS09G0481200,OS10G0479500,OS12G0188700,OS03G0751100,OS03G0227700,OS01G0913000,OS04G0643600,OS05G0101600,OS08G0440100,OS08G0412401,OS05G0200100,OS01G0963400,OS02G0639900,OS03G0651000,OS02G0181300,OS07G0619200,OS10G0482…
GO:BP	cellular response to UV-B	GO:0071493	0.0407538	1.389831764690864	3	976	2	0.00204918	36851	8.14089e-05	OS01G0710700,OS08G0561700
GO:BP	cellular response to oxygen-containing compound	GO:1901701	0.0445971	1.350693285582921	293	976	17	0.017418	36851	0.00795094	OS02G0685900,OS09G0451000,OS04G0584600,OS07G0622000,OS04G0631100,OS07G0569100,OS02G0126400,OS08G0561700,OS03G0227700,OS05G0213500,OS01G0192000,OS02G0580300,OS02G0181300,OS06G0547900,OS07G0568600,OS05G0323900,OS07G0161600
GO:BP	sucrose metabolic process	GO:0005985	0.0474932	1.3233683568968955	36	976	5	0.00512295	36851	0.000976907	OS01G0332100,OS11G0236100,OS02G0550600,OS03G0267300,OS02G0529400
GO:BP	photosynthetic electron transport in photosystem I	GO:0009773	0.0497709	1.3030242699271193	11	976	3	0.00307377	36851	0.000298499	OS09G0481200,OS07G0489800,OS03G0267300

## Sheet: Leaves - Down
Supplementary Table 4 : Gene Ontology term enrichment analysis of commonly regulated genes by each strains
source	term_name	term_id	adjusted_p_value	negative_log10_of_adjusted_p_value	term_size	query_size	intersection_size			effective_domain_size	intersections
GO:BP	cellular process	GO:0009987	2.30332e-23	22.63764545646339	13683	1141	598	0.524102	0.371306	36851	OS04G0122200,OS03G0293000,OS04G0625350,OS08G0500700,OS01G0117266,OS09G0482600,OS02G0118875,OS11G0670100,OS01G0952500,OS07G0628500,OS11G0106400,OS08G0140300,OS09G0428300,OS01G0848400,OS03G0787300,OS05G0492600,OS07G0646100,OS12G0106000,OS01G0201200,OS07G0184800,OS04G0369066,OS11G0137300,OS08G0111200,OS08G0230800,OS06G0581500,OS02G0154000,OS12G0514500,OS02G0603800,OS06G0727400,OS06G0526600,OS07G0117…
GO:BP	biological_process	GO:0008150	2.33963e-20	19.630853158394146	17854	1141	717	0.628396	0.484492	36851	OS11G0489250,OS04G0122200,OS01G0795200,OS04G0171800,OS05G0336200,OS03G0293000,OS04G0625350,OS08G0500700,OS08G0158200,OS12G0507700,OS01G0117266,OS09G0482600,OS02G0118875,OS11G0670100,OS01G0952500,OS07G0628500,OS11G0106400,OS07G0634400,OS08G0140300,OS09G0428300,OS01G0848400,OS07G0539900,OS03G0787300,OS05G0492600,OS07G0646100,OS07G0281800,OS12G0106000,OS01G0201200,OS07G0184800,OS04G0369066,OS01G0940…
GO:BP	organic substance metabolic process	GO:0071704	2.70275e-10	9.568194147966933	11699	1141	476	0.417178	0.317468	36851	OS04G0122200,OS01G0795200,OS04G0625350,OS01G0117266,OS11G0670100,OS01G0952500,OS07G0628500,OS11G0106400,OS08G0140300,OS01G0848400,OS07G0539900,OS07G0646100,OS01G0201200,OS07G0184800,OS04G0369066,OS01G0940800,OS06G0545900,OS08G0111200,OS08G0230800,OS06G0581500,OS02G0154000,OS02G0603800,OS06G0727400,OS06G0526600,OS07G0203275,OS06G0699600,OS06G0499301,OS02G0491400,OS02G0664100,OS08G0525600,OS11G0155…
GO:BP	cellular metabolic process	GO:0044237	3.88593e-10	9.410505451142647	11305	1141	461	0.404032	0.306776	36851	OS04G0122200,OS04G0625350,OS01G0117266,OS11G0670100,OS01G0952500,OS07G0628500,OS11G0106400,OS08G0140300,OS01G0848400,OS07G0646100,OS12G0106000,OS01G0201200,OS07G0184800,OS04G0369066,OS08G0111200,OS08G0230800,OS06G0581500,OS02G0154000,OS02G0603800,OS06G0727400,OS06G0526600,OS07G0203275,OS06G0699600,OS06G0499301,OS02G0491400,OS02G0664100,OS08G0525600,OS11G0155000,OS01G0117200,OS07G0679700,OS06G0586…
GO:BP	primary metabolic process	GO:0044238	3.88593e-10	9.410505451142647	11119	1141	455	0.398773	0.301729	36851	OS04G0122200,OS01G0795200,OS04G0625350,OS01G0117266,OS11G0670100,OS01G0952500,OS07G0628500,OS11G0106400,OS08G0140300,OS01G0848400,OS07G0539900,OS07G0646100,OS01G0201200,OS07G0184800,OS04G0369066,OS01G0940800,OS06G0545900,OS08G0111200,OS08G0230800,OS06G0581500,OS02G0154000,OS02G0603800,OS06G0727400,OS06G0526600,OS07G0203275,OS06G0699600,OS06G0499301,OS02G0491400,OS02G0664100,OS08G0525600,OS11G0155…
GO:BP	biological regulation	GO:0065007	8.20094e-10	9.086136488123843	5764	1141	267	0.234005	0.156414	36851	OS02G0118875,OS11G0670100,OS01G0952500,OS07G0628500,OS08G0140300,OS09G0428300,OS01G0848400,OS05G0492600,OS12G0106000,OS01G0201200,OS07G0184800,OS06G0210000,OS01G0933500,OS02G0603800,OS06G0727400,OS07G0117000,OS06G0699600,OS08G0202400,OS06G0716700,OS02G0664100,OS11G0155000,OS12G0273300,OS07G0679700,OS09G0479500,OS07G0564750,OS02G0470600,OS01G0672201,OS12G0123800,OS08G0162100,OS06G0680500,OS10G0135…
GO:BP	cellular nitrogen compound metabolic process	GO:0034641	1.84844e-09	8.73319513668056	5705	1141	263	0.2305	0.154813	36851	OS04G0625350,OS01G0952500,OS07G0628500,OS08G0140300,OS01G0848400,OS07G0184800,OS08G0111200,OS02G0603800,OS06G0526600,OS07G0203275,OS06G0699600,OS06G0499301,OS02G0664100,OS11G0155000,OS07G0679700,OS01G0672201,OS12G0123800,OS08G0162100,OS01G0764000,OS02G0152800,OS02G0123300,OS03G0650700,OS07G0621100,OS01G0834700,OS10G0550066,OS02G0611200,OS01G0305900,OS02G0191600,OS06G0493801,OS07G0648266,OS02G0182…
GO:BP	RNA metabolic process	GO:0016070	2.36076e-09	8.626947625702018	3720	1141	188	0.164768	0.100947	36851	OS04G0625350,OS01G0952500,OS07G0628500,OS01G0848400,OS07G0184800,OS06G0526600,OS07G0203275,OS06G0699600,OS06G0499301,OS11G0155000,OS07G0679700,OS01G0672201,OS12G0123800,OS08G0162100,OS02G0152800,OS07G0621100,OS10G0550066,OS01G0305900,OS02G0191600,OS06G0493801,OS07G0648266,OS02G0182100,OS06G0574450,OS04G0432250,OS11G0158832,OS05G0100500,OS02G0700300,OS03G0352450,OS09G0327200,OS08G0340900,OS06G0565…
GO:BP	regulation of biological process	GO:0050789	1.14033e-08	7.94297058948849	5022	1141	234	0.205083	0.136279	36851	OS02G0118875,OS11G0670100,OS01G0952500,OS07G0628500,OS09G0428300,OS01G0848400,OS05G0492600,OS01G0201200,OS07G0184800,OS01G0933500,OS02G0603800,OS06G0727400,OS07G0117000,OS06G0699600,OS08G0202400,OS06G0716700,OS02G0664100,OS11G0155000,OS12G0273300,OS07G0679700,OS09G0479500,OS07G0564750,OS01G0672201,OS12G0123800,OS08G0162100,OS06G0680500,OS10G0135100,OS11G0224900,OS06G0301300,OS02G0272900,OS05G0332…
GO:BP	macromolecule metabolic process	GO:0043170	1.29658e-08	7.887200686024324	9297	1141	384	0.336547	0.252286	36851	OS04G0122200,OS01G0795200,OS04G0625350,OS01G0117266,OS11G0670100,OS01G0952500,OS07G0628500,OS11G0106400,OS01G0848400,OS07G0646100,OS01G0201200,OS07G0184800,OS04G0369066,OS08G0230800,OS06G0581500,OS02G0154000,OS06G0727400,OS06G0526600,OS07G0203275,OS06G0699600,OS06G0499301,OS02G0491400,OS02G0664100,OS08G0525600,OS11G0155000,OS01G0117200,OS07G0679700,OS06G0586150,OS05G0386800,OS01G0672201,OS12G0123…
GO:BP	heterocycle metabolic process	GO:0046483	1.82759e-08	7.73812178390712	5003	1141	232	0.20333	0.135763	36851	OS04G0625350,OS01G0952500,OS07G0628500,OS08G0140300,OS01G0848400,OS07G0184800,OS02G0603800,OS06G0526600,OS07G0203275,OS06G0699600,OS06G0499301,OS02G0664100,OS11G0155000,OS07G0679700,OS01G0672201,OS12G0123800,OS08G0162100,OS02G0152800,OS07G0621100,OS10G0550066,OS02G0611200,OS01G0305900,OS02G0191600,OS06G0493801,OS07G0648266,OS02G0182100,OS06G0574450,OS04G0432250,OS11G0158832,OS05G0100500,OS02G0700…
GO:BP	nucleobase-containing compound metabolic process	GO:0006139	2.15545e-08	7.666462806565755	4772	1141	223	0.195443	0.129494	36851	OS04G0625350,OS01G0952500,OS07G0628500,OS01G0848400,OS07G0184800,OS02G0603800,OS06G0526600,OS07G0203275,OS06G0699600,OS06G0499301,OS02G0664100,OS11G0155000,OS07G0679700,OS01G0672201,OS12G0123800,OS08G0162100,OS02G0152800,OS07G0621100,OS10G0550066,OS02G0611200,OS01G0305900,OS02G0191600,OS06G0493801,OS07G0648266,OS02G0182100,OS06G0574450,OS04G0432250,OS11G0158832,OS05G0100500,OS02G0700300,OS03G0352…
GO:BP	nitrogen compound metabolic process	GO:0006807	5.45341e-08	7.263331665022066	9951	1141	402	0.352323	0.270033	36851	OS04G0122200,OS01G0795200,OS04G0625350,OS01G0117266,OS11G0670100,OS01G0952500,OS07G0628500,OS11G0106400,OS08G0140300,OS01G0848400,OS07G0646100,OS01G0201200,OS07G0184800,OS04G0369066,OS08G0111200,OS08G0230800,OS06G0581500,OS02G0154000,OS02G0603800,OS06G0727400,OS06G0526600,OS07G0203275,OS06G0699600,OS06G0499301,OS02G0491400,OS02G0664100,OS08G0525600,OS11G0155000,OS01G0117200,OS07G0679700,OS06G0586…
GO:BP	gene expression	GO:0010467	1.08736e-07	6.963627230385491	3897	1141	187	0.163891	0.10575	36851	OS04G0625350,OS01G0952500,OS07G0628500,OS01G0848400,OS07G0184800,OS07G0203275,OS06G0699600,OS11G0155000,OS07G0679700,OS01G0672201,OS12G0123800,OS08G0162100,OS02G0152800,OS02G0123300,OS03G0650700,OS01G0834700,OS10G0550066,OS01G0305900,OS02G0191600,OS07G0648266,OS02G0182100,OS06G0574450,OS04G0432250,OS11G0158832,OS05G0100500,OS02G0700300,OS03G0352450,OS08G0340900,OS04G0615700,OS01G0650800,OS06G0303…
GO:BP	nucleic acid metabolic process	GO:0090304	1.49371e-07	6.825733534959837	4291	1141	201	0.176161	0.116442	36851	OS04G0625350,OS01G0952500,OS07G0628500,OS01G0848400,OS07G0184800,OS06G0526600,OS07G0203275,OS06G0699600,OS06G0499301,OS11G0155000,OS07G0679700,OS01G0672201,OS12G0123800,OS08G0162100,OS02G0152800,OS07G0621100,OS10G0550066,OS01G0305900,OS02G0191600,OS06G0493801,OS07G0648266,OS02G0182100,OS06G0574450,OS04G0432250,OS11G0158832,OS05G0100500,OS02G0700300,OS03G0352450,OS09G0327200,OS08G0340900,OS06G0565…
GO:BP	cellular aromatic compound metabolic process	GO:0006725	1.66744e-07	6.777948577657635	5118	1141	231	0.202454	0.138884	36851	OS04G0625350,OS01G0952500,OS07G0628500,OS08G0140300,OS01G0848400,OS07G0184800,OS02G0603800,OS06G0526600,OS07G0203275,OS06G0699600,OS06G0499301,OS02G0664100,OS11G0155000,OS07G0679700,OS01G0672201,OS12G0123800,OS08G0162100,OS02G0152800,OS07G0621100,OS10G0550066,OS02G0611200,OS01G0305900,OS02G0191600,OS06G0493801,OS07G0648266,OS02G0182100,OS06G0574450,OS04G0432250,OS11G0158832,OS05G0100500,OS02G0700…
GO:BP	organic cyclic compound metabolic process	GO:1901360	2.32828e-07	6.6329645094065235	5196	1141	233	0.204207	0.141	36851	OS04G0625350,OS01G0952500,OS07G0628500,OS08G0140300,OS01G0848400,OS07G0184800,OS02G0603800,OS06G0526600,OS07G0203275,OS06G0699600,OS06G0499301,OS02G0664100,OS11G0155000,OS07G0679700,OS01G0672201,OS12G0123800,OS08G0162100,OS02G0152800,OS07G0621100,OS10G0550066,OS02G0611200,OS01G0305900,OS02G0191600,OS06G0493801,OS07G0648266,OS02G0182100,OS06G0574450,OS04G0432250,OS11G0158832,OS05G0100500,OS02G0700…
GO:BP	metabolic process	GO:0008152	8.98491e-07	6.046486469472718	13778	1141	519	0.454864	0.373884	36851	OS11G0489250,OS04G0122200,OS01G0795200,OS04G0171800,OS03G0293000,OS04G0625350,OS08G0158200,OS01G0117266,OS11G0670100,OS01G0952500,OS07G0628500,OS11G0106400,OS07G0634400,OS08G0140300,OS01G0848400,OS07G0539900,OS07G0646100,OS07G0281800,OS12G0106000,OS01G0201200,OS07G0184800,OS04G0369066,OS01G0940800,OS06G0545900,OS08G0111200,OS08G0230800,OS06G0581500,OS02G0154000,OS02G0603800,OS06G0727400,OS06G0526…
GO:BP	signal transduction	GO:0007165	1.36374e-06	5.865268637799651	1775	1141	99	0.086766	0.0481669	36851	OS02G0118875,OS11G0670100,OS01G0952500,OS09G0428300,OS05G0492600,OS01G0201200,OS02G0603800,OS06G0727400,OS07G0117000,OS08G0202400,OS02G0664100,OS12G0273300,OS09G0479500,OS07G0564750,OS06G0680500,OS10G0135100,OS11G0224900,OS02G0272900,OS05G0332300,OS06G0291800,OS11G0266500,OS02G0182100,OS11G0227200,OS11G0598300,OS05G0586200,OS06G0181100,OS10G0381800,OS10G0564500,OS07G0283125,OS01G0824600,OS01G0668…
GO:BP	regulation of cellular process	GO:0050794	1.58315e-06	5.800477188535697	4630	1141	208	0.182296	0.125641	36851	OS02G0118875,OS11G0670100,OS01G0952500,OS07G0628500,OS09G0428300,OS01G0848400,OS05G0492600,OS01G0201200,OS07G0184800,OS02G0603800,OS06G0727400,OS07G0117000,OS06G0699600,OS08G0202400,OS02G0664100,OS12G0273300,OS07G0679700,OS09G0479500,OS07G0564750,OS01G0672201,OS12G0123800,OS08G0162100,OS06G0680500,OS10G0135100,OS11G0224900,OS06G0301300,OS02G0272900,OS05G0332300,OS10G0550066,OS01G0305900,OS06G0291…
GO:BP	signaling	GO:0023052	1.58315e-06	5.800477188535697	1784	1141	99	0.086766	0.0484112	36851	OS02G0118875,OS11G0670100,OS01G0952500,OS09G0428300,OS05G0492600,OS01G0201200,OS02G0603800,OS06G0727400,OS07G0117000,OS08G0202400,OS02G0664100,OS12G0273300,OS09G0479500,OS07G0564750,OS06G0680500,OS10G0135100,OS11G0224900,OS02G0272900,OS05G0332300,OS06G0291800,OS11G0266500,OS02G0182100,OS11G0227200,OS11G0598300,OS05G0586200,OS06G0181100,OS10G0381800,OS10G0564500,OS07G0283125,OS01G0824600,OS01G0668…
GO:BP	cell communication	GO:0007154	2.53019e-06	5.59684753847911	1950	1141	105	0.0920245	0.0529158	36851	OS04G0122200,OS02G0118875,OS11G0670100,OS01G0952500,OS09G0428300,OS05G0492600,OS01G0201200,OS08G0230800,OS02G0603800,OS06G0727400,OS07G0117000,OS08G0202400,OS02G0664100,OS12G0273300,OS09G0479500,OS07G0564750,OS06G0680500,OS10G0135100,OS11G0224900,OS02G0272900,OS05G0332300,OS06G0291800,OS11G0266500,OS02G0182100,OS11G0227200,OS11G0598300,OS05G0586200,OS06G0181100,OS10G0381800,OS10G0564500,OS07G0283…
GO:BP	cellular response to stimulus	GO:0051716	4.51649e-06	5.345198517982077	2659	1141	132	0.115688	0.0721554	36851	OS02G0118875,OS11G0670100,OS01G0952500,OS11G0106400,OS09G0428300,OS05G0492600,OS01G0201200,OS02G0603800,OS06G0727400,OS07G0117000,OS08G0202400,OS06G0716700,OS02G0664100,OS04G0473900,OS12G0273300,OS09G0479500,OS07G0564750,OS06G0680500,OS10G0135100,OS11G0224900,OS02G0272900,OS05G0332300,OS06G0291800,OS11G0266500,OS02G0182100,OS11G0227200,OS11G0598300,OS03G0352450,OS05G0586200,OS06G0181100,OS05G0557…
GO:BP	localization	GO:0051179	5.25964e-06	5.279044154816814	2694	1141	133	0.116564	0.0731052	36851	OS05G0336200,OS09G0428300,OS12G0106000,OS06G0210000,OS08G0492000,OS02G0603800,OS02G0550800,OS06G0716700,OS08G0206400,OS02G0470600,OS12G0240000,OS03G0112101,OS06G0680500,OS01G0976100,OS03G0254200,OS01G0777000,OS11G0660000,OS01G0719600,OS07G0151200,OS02G0211000,OS08G0116700,OS03G0673800,OS04G0438600,OS11G0129200,OS05G0100600,OS02G0678200,OS09G0407950,OS04G0556000,OS02G0202300,OS06G0228500,OS04G0542…
GO:BP	transport	GO:0006810	1.23737e-05	4.907501955081034	2555	1141	126	0.110429	0.0693333	36851	OS05G0336200,OS09G0428300,OS12G0106000,OS06G0210000,OS08G0492000,OS02G0603800,OS02G0550800,OS06G0716700,OS08G0206400,OS02G0470600,OS12G0240000,OS03G0112101,OS06G0680500,OS01G0976100,OS03G0254200,OS01G0777000,OS11G0660000,OS01G0719600,OS07G0151200,OS02G0211000,OS08G0116700,OS03G0673800,OS04G0438600,OS11G0129200,OS05G0100600,OS02G0678200,OS09G0407950,OS04G0556000,OS02G0202300,OS06G0228500,OS04G0542…
GO:BP	establishment of localization	GO:0051234	1.43857e-05	4.8420704516930915	2590	1141	127	0.111306	0.070283	36851	OS05G0336200,OS09G0428300,OS12G0106000,OS06G0210000,OS08G0492000,OS02G0603800,OS02G0550800,OS06G0716700,OS08G0206400,OS02G0470600,OS12G0240000,OS03G0112101,OS06G0680500,OS01G0976100,OS03G0254200,OS01G0777000,OS11G0660000,OS01G0719600,OS07G0151200,OS02G0211000,OS08G0116700,OS03G0673800,OS04G0438600,OS11G0129200,OS05G0100600,OS02G0678200,OS09G0407950,OS04G0556000,OS02G0202300,OS06G0228500,OS04G0542…
GO:BP	glycolipid catabolic process	GO:0019377	6.10201e-05	4.214527096569067	4	1141	4	0.0035057	0.000108545	36851	OS08G0111200,OS11G0242100,OS10G0473400,OS07G0444000
GO:BP	glycosphingolipid catabolic process	GO:0046479	6.10201e-05	4.214527096569067	4	1141	4	0.0035057	0.000108545	36851	OS08G0111200,OS11G0242100,OS10G0473400,OS07G0444000
GO:BP	glucosylceramide catabolic process	GO:0006680	6.10201e-05	4.214527096569067	4	1141	4	0.0035057	0.000108545	36851	OS08G0111200,OS11G0242100,OS10G0473400,OS07G0444000
GO:BP	glycosylceramide catabolic process	GO:0046477	6.10201e-05	4.214527096569067	4	1141	4	0.0035057	0.000108545	36851	OS08G0111200,OS11G0242100,OS10G0473400,OS07G0444000
GO:BP	response to stimulus	GO:0050896	6.184e-05	4.208730750604576	3942	1141	174	0.152498	0.106971	36851	OS03G0293000,OS08G0500700,OS12G0507700,OS09G0482600,OS02G0118875,OS11G0670100,OS01G0952500,OS11G0106400,OS09G0428300,OS03G0787300,OS05G0492600,OS12G0106000,OS01G0201200,OS12G0514500,OS02G0603800,OS06G0727400,OS07G0117000,OS08G0202400,OS06G0716700,OS02G0664100,OS04G0473900,OS12G0273300,OS09G0479500,OS07G0564750,OS06G0680500,OS10G0135100,OS11G0224900,OS02G0272900,OS05G0332300,OS06G0291800,OS11G0266…
GO:BP	protein folding	GO:0006457	9.68569e-05	4.0138693363833	237	1141	23	0.0201578	0.0064313	36851	OS08G0500700,OS09G0482600,OS03G0787300,OS12G0514500,OS02G0491400,OS06G0716700,OS03G0859700,OS02G0664100,OS08G0525600,OS08G0487800,OS09G0474300,OS08G0161900,OS04G0402100,OS06G0196900,OS01G0895600,OS03G0426900,OS01G0563000,OS12G0236700,OS05G0230600,OS03G0619400,OS08G0359500,OS10G0485100,OS02G0760300
GO:BP	macromolecule localization	GO:0033036	0.000107588	3.9682363297026915	924	1141	56	0.0490798	0.0250739	36851	OS06G0716700,OS02G0470600,OS03G0112101,OS02G0211000,OS08G0116700,OS04G0438600,OS05G0100600,OS09G0407950,OS03G0326100,OS01G0827600,OS05G0557400,OS09G0474300,OS02G0741500,OS07G0680000,OS03G0172000,OS06G0589300,OS10G0412050,OS07G0211000,OS03G0225500,OS08G0104300,OS12G0631100,OS08G0162000,OS10G0163100,OS11G0169100,OS05G0560400,OS07G0693400,OS01G0128800,OS08G0496900,OS05G0519400,OS05G0168500,OS10G0135…
GO:BP	cellular macromolecule metabolic process	GO:0044260	0.000108335	3.9652308838467585	7516	1141	297	0.260298	0.203956	36851	OS04G0122200,OS01G0117266,OS11G0670100,OS01G0952500,OS07G0628500,OS11G0106400,OS01G0848400,OS07G0646100,OS01G0201200,OS07G0184800,OS04G0369066,OS08G0230800,OS06G0581500,OS02G0154000,OS06G0727400,OS06G0699600,OS02G0491400,OS02G0664100,OS08G0525600,OS11G0155000,OS01G0117200,OS07G0679700,OS06G0586150,OS05G0386800,OS01G0672201,OS12G0123800,OS02G0247000,OS08G0162100,OS02G0277700,OS03G0683900,OS02G0152…
GO:BP	regulation of gene expression	GO:0010468	0.000124641	3.90433987671938	2530	1141	120	0.105171	0.0686549	36851	OS01G0952500,OS07G0628500,OS01G0848400,OS07G0184800,OS06G0699600,OS11G0155000,OS07G0679700,OS01G0672201,OS12G0123800,OS08G0162100,OS10G0550066,OS01G0305900,OS02G0191600,OS07G0648266,OS02G0182100,OS11G0158832,OS05G0100500,OS02G0700300,OS03G0352450,OS04G0615700,OS01G0650800,OS06G0303700,OS01G0919400,OS03G0218300,OS10G0381800,OS02G0631601,OS06G0562700,OS12G0556300,OS01G0147700,OS09G0549450,OS03G0583…
GO:BP	cellular macromolecule biosynthetic process	GO:0034645	0.000153881	3.8128136395645	3596	1141	159	0.139351	0.0975822	36851	OS01G0952500,OS07G0628500,OS01G0848400,OS07G0184800,OS06G0699600,OS02G0664100,OS07G0679700,OS05G0386800,OS01G0672201,OS12G0123800,OS02G0247000,OS08G0162100,OS02G0152800,OS02G0123300,OS03G0650700,OS01G0834700,OS10G0550066,OS01G0305900,OS02G0191600,OS07G0648266,OS02G0182100,OS06G0574450,OS11G0158832,OS05G0100500,OS02G0700300,OS03G0352450,OS08G0340900,OS02G0832400,OS01G0650800,OS06G0303700,OS04G0624…
GO:BP	cellular protein localization	GO:0034613	0.000155367	3.808641088471647	625	1141	42	0.0368098	0.0169602	36851	OS02G0470600,OS03G0112101,OS08G0116700,OS09G0407950,OS09G0474300,OS02G0741500,OS07G0680000,OS03G0172000,OS03G0225500,OS12G0631100,OS08G0162000,OS10G0163100,OS11G0169100,OS05G0560400,OS07G0693400,OS08G0496900,OS05G0519400,OS05G0168500,OS10G0135200,OS04G0337201,OS11G0546000,OS05G0151400,OS10G0492000,OS12G0136200,OS09G0508300,OS11G0482100,OS12G0166500,OS01G0920200,OS03G0666500,OS10G0575200,OS02G0105…
GO:BP	cellular biosynthetic process	GO:0044249	0.000174506	3.7581892404906165	4810	1141	202	0.177038	0.130526	36851	OS01G0952500,OS07G0628500,OS08G0140300,OS01G0848400,OS07G0184800,OS02G0603800,OS06G0699600,OS02G0664100,OS07G0679700,OS05G0386800,OS01G0672201,OS12G0123800,OS02G0247000,OS08G0162100,OS02G0152800,OS02G0123300,OS03G0650700,OS01G0834700,OS10G0550066,OS02G0611200,OS01G0305900,OS02G0191600,OS07G0648266,OS02G0182100,OS02G0704000,OS06G0574450,OS05G0582300,OS11G0158832,OS05G0100500,OS02G0700300,OS03G0352…
GO:BP	cellular macromolecule localization	GO:0070727	0.000202113	3.6944053547346547	633	1141	42	0.0368098	0.0171773	36851	OS02G0470600,OS03G0112101,OS08G0116700,OS09G0407950,OS09G0474300,OS02G0741500,OS07G0680000,OS03G0172000,OS03G0225500,OS12G0631100,OS08G0162000,OS10G0163100,OS11G0169100,OS05G0560400,OS07G0693400,OS08G0496900,OS05G0519400,OS05G0168500,OS10G0135200,OS04G0337201,OS11G0546000,OS05G0151400,OS10G0492000,OS12G0136200,OS09G0508300,OS11G0482100,OS12G0166500,OS01G0920200,OS03G0666500,OS10G0575200,OS02G0105…
GO:BP	ceramide catabolic process	GO:0046514	0.000207606	3.682759773885471	5	1141	4	0.0035057	0.000135682	36851	OS08G0111200,OS11G0242100,OS10G0473400,OS07G0444000
GO:BP	glycosphingolipid metabolic process	GO:0006687	0.000207606	3.682759773885471	5	1141	4	0.0035057	0.000135682	36851	OS08G0111200,OS11G0242100,OS10G0473400,OS07G0444000
GO:BP	glucosylceramide metabolic process	GO:0006678	0.000207606	3.682759773885471	5	1141	4	0.0035057	0.000135682	36851	OS08G0111200,OS11G0242100,OS10G0473400,OS07G0444000
GO:BP	glycosylceramide metabolic process	GO:0006677	0.000207606	3.682759773885471	5	1141	4	0.0035057	0.000135682	36851	OS08G0111200,OS11G0242100,OS10G0473400,OS07G0444000
GO:BP	regulation of metabolic process	GO:0019222	0.000253091	3.5967232672256046	3038	1141	137	0.12007	0.0824401	36851	OS01G0952500,OS07G0628500,OS01G0848400,OS07G0184800,OS06G0699600,OS11G0155000,OS07G0679700,OS01G0672201,OS12G0123800,OS08G0162100,OS06G0301300,OS10G0550066,OS01G0305900,OS02G0191600,OS07G0648266,OS02G0182100,OS11G0158832,OS05G0100500,OS02G0700300,OS03G0352450,OS01G0943800,OS01G0942900,OS04G0615700,OS01G0650800,OS05G0586200,OS06G0303700,OS05G0557400,OS01G0919400,OS03G0218300,OS10G0381800,OS02G0631…
GO:BP	macromolecule modification	GO:0043412	0.000305658	3.5147638763245896	4073	1141	174	0.152498	0.110526	36851	OS04G0122200,OS01G0117266,OS11G0670100,OS11G0106400,OS07G0646100,OS01G0201200,OS04G0369066,OS08G0230800,OS06G0581500,OS02G0154000,OS06G0727400,OS06G0499301,OS02G0491400,OS02G0664100,OS08G0525600,OS01G0117200,OS06G0586150,OS02G0277700,OS03G0683900,OS04G0402500,OS07G0621100,OS05G0332300,OS05G0358500,OS06G0493801,OS02G0227700,OS05G0582300,OS03G0179000,OS05G0100500,OS09G0327200,OS01G0818700,OS01G0943…
GO:BP	macromolecule biosynthetic process	GO:0009059	0.000337121	3.4722140159003345	3663	1141	159	0.139351	0.0994003	36851	OS01G0952500,OS07G0628500,OS01G0848400,OS07G0184800,OS06G0699600,OS02G0664100,OS07G0679700,OS05G0386800,OS01G0672201,OS12G0123800,OS02G0247000,OS08G0162100,OS02G0152800,OS02G0123300,OS03G0650700,OS01G0834700,OS10G0550066,OS01G0305900,OS02G0191600,OS07G0648266,OS02G0182100,OS06G0574450,OS11G0158832,OS05G0100500,OS02G0700300,OS03G0352450,OS08G0340900,OS02G0832400,OS01G0650800,OS06G0303700,OS04G0624…
GO:BP	endocytosis	GO:0006897	0.000350603	3.4551846828527495	45	1141	9	0.00788782	0.00122113	36851	OS03G0112101,OS01G0634300,OS02G0810400,OS02G0793100,OS05G0200500,OS05G0579900,OS10G0575200,OS02G0622100,OS01G0772600
GO:BP	cellular localization	GO:0051641	0.000351302	3.4543189147969846	811	1141	49	0.0429448	0.0220075	36851	OS12G0106000,OS02G0470600,OS03G0112101,OS08G0116700,OS09G0407950,OS02G0202300,OS09G0474300,OS03G0399532,OS02G0741500,OS07G0680000,OS03G0172000,OS03G0395300,OS03G0225500,OS06G0103800,OS12G0631100,OS08G0162000,OS10G0163100,OS11G0169100,OS05G0560400,OS07G0693400,OS08G0496900,OS05G0519400,OS05G0168500,OS10G0135200,OS04G0337201,OS11G0546000,OS05G0151400,OS10G0492000,OS12G0136200,OS09G0508300,OS11G0482…
GO:BP	organic substance biosynthetic process	GO:1901576	0.00044714	3.3495563725522035	4929	1141	203	0.177914	0.133755	36851	OS01G0952500,OS07G0628500,OS08G0140300,OS01G0848400,OS07G0184800,OS02G0603800,OS06G0699600,OS02G0664100,OS07G0679700,OS05G0386800,OS01G0672201,OS12G0123800,OS02G0247000,OS08G0162100,OS02G0152800,OS02G0123300,OS03G0650700,OS01G0834700,OS10G0550066,OS02G0611200,OS01G0305900,OS02G0191600,OS07G0648266,OS02G0182100,OS02G0704000,OS06G0574450,OS05G0582300,OS11G0158832,OS05G0100500,OS02G0700300,OS03G0352…
GO:BP	sphingolipid catabolic process	GO:0030149	0.000512172	3.290584375065487	6	1141	4	0.0035057	0.000162818	36851	OS08G0111200,OS11G0242100,OS10G0473400,OS07G0444000
GO:BP	membrane lipid catabolic process	GO:0046466	0.000512172	3.290584375065487	6	1141	4	0.0035057	0.000162818	36851	OS08G0111200,OS11G0242100,OS10G0473400,OS07G0444000
GO:BP	protein localization	GO:0008104	0.000561952	3.250301024342808	759	1141	46	0.0403155	0.0205965	36851	OS06G0716700,OS02G0470600,OS03G0112101,OS08G0116700,OS09G0407950,OS01G0827600,OS09G0474300,OS02G0741500,OS07G0680000,OS03G0172000,OS07G0211000,OS03G0225500,OS08G0104300,OS12G0631100,OS08G0162000,OS10G0163100,OS11G0169100,OS05G0560400,OS07G0693400,OS08G0496900,OS05G0519400,OS05G0168500,OS10G0135200,OS04G0337201,OS11G0546000,OS05G0151400,OS10G0492000,OS12G0136200,OS09G0508300,OS11G0482100,OS12G0166…
GO:BP	cellular nitrogen compound biosynthetic process	GO:0044271	0.000562256	3.2500658872016075	3624	1141	156	0.136722	0.098342	36851	OS01G0952500,OS07G0628500,OS08G0140300,OS01G0848400,OS07G0184800,OS02G0603800,OS06G0699600,OS07G0679700,OS01G0672201,OS12G0123800,OS08G0162100,OS02G0152800,OS02G0123300,OS03G0650700,OS01G0834700,OS10G0550066,OS02G0611200,OS01G0305900,OS02G0191600,OS07G0648266,OS02G0182100,OS06G0574450,OS11G0158832,OS05G0100500,OS02G0700300,OS03G0352450,OS08G0340900,OS01G0650800,OS06G0303700,OS05G0104650,OS01G0919…
GO:BP	negative regulation of gene expression	GO:0010629	0.000622457	3.2058909428345053	392	1141	29	0.0254163	0.0106374	36851	OS07G0184800,OS11G0155000,OS05G0100500,OS03G0352450,OS04G0615700,OS02G0631601,OS01G0147700,OS03G0583900,OS03G0789466,OS03G0419100,OS03G0151300,OS06G0729300,OS05G0545600,OS01G0375000,OS02G0722800,OS06G0731600,OS01G0275600,OS10G0556700,OS11G0207100,OS03G0121800,OS03G0749800,OS11G0572100,OS01G0909200,OS08G0305300,OS11G0207000,OS01G0633200,OS09G0515100,OS05G0243200,OS01G0109700
GO:BP	regulation of macromolecule metabolic process	GO:0060255	0.000845	3.0731432156079133	2963	1141	131	0.114812	0.0804049	36851	OS01G0952500,OS07G0628500,OS01G0848400,OS07G0184800,OS06G0699600,OS11G0155000,OS07G0679700,OS01G0672201,OS12G0123800,OS08G0162100,OS06G0301300,OS10G0550066,OS01G0305900,OS02G0191600,OS07G0648266,OS02G0182100,OS11G0158832,OS05G0100500,OS02G0700300,OS03G0352450,OS01G0943800,OS01G0942900,OS04G0615700,OS01G0650800,OS06G0303700,OS01G0919400,OS03G0218300,OS10G0381800,OS02G0631601,OS06G0562700,OS12G0556…
GO:BP	cellular component organization or biogenesis	GO:0071840	0.000944786	3.024666682017487	2780	1141	124	0.108677	0.0754389	36851	OS03G0293000,OS04G0625350,OS07G0184800,OS11G0137300,OS07G0203275,OS03G0859700,OS05G0386800,OS01G0805900,OS02G0697600,OS03G0650700,OS02G0830801,OS05G0100500,OS03G0352450,OS04G0438600,OS10G0578800,OS05G0537200,OS05G0100600,OS09G0407950,OS02G0202300,OS03G0326100,OS12G0606100,OS10G0572000,OS02G0520750,OS01G0634300,OS02G0741500,OS07G0141600,OS04G0675800,OS09G0362900,OS02G0830300,OS10G0450900,OS03G0172…
GO:BP	gene silencing	GO:0016458	0.00109469	2.9607098709211184	140	1141	15	0.0131464	0.00379908	36851	OS07G0184800,OS03G0352450,OS04G0615700,OS01G0147700,OS03G0583900,OS03G0789466,OS06G0729300,OS05G0545600,OS01G0275600,OS03G0121800,OS03G0749800,OS11G0572100,OS01G0909200,OS01G0633200,OS09G0515100
GO:BP	starch biosynthetic process	GO:0019252	0.00126734	2.897107838531138	31	1141	7	0.00613497	0.000841225	36851	OS04G0624600,OS02G0744700,OS03G0712700,OS05G0533600,OS08G0520900,OS02G0135900,OS07G0412100
GO:BP	protein transport	GO:0015031	0.00137227	2.8625591536387223	676	1141	41	0.0359334	0.0183441	36851	OS06G0716700,OS02G0470600,OS03G0112101,OS08G0116700,OS09G0407950,OS01G0827600,OS09G0474300,OS02G0741500,OS07G0680000,OS03G0172000,OS07G0211000,OS03G0225500,OS08G0104300,OS12G0631100,OS10G0163100,OS11G0169100,OS07G0693400,OS05G0519400,OS10G0135200,OS04G0337201,OS11G0546000,OS05G0151400,OS10G0492000,OS12G0136200,OS09G0508300,OS11G0482100,OS12G0166500,OS01G0920200,OS03G0666500,OS10G0575200,OS02G0105…
GO:BP	vesicle-mediated transport	GO:0016192	0.00137227	2.8625591536387223	454	1141	31	0.0271691	0.0123199	36851	OS03G0112101,OS01G0777000,OS05G0100600,OS09G0407950,OS01G0827600,OS03G0399532,OS01G0634300,OS07G0680000,OS02G0810400,OS10G0412050,OS07G0211000,OS02G0793100,OS11G0169100,OS05G0519400,OS05G0200500,OS05G0579900,OS11G0482100,OS12G0236700,OS10G0575200,OS02G0622100,OS02G0105100,OS12G0554400,OS01G0772600,OS08G0337700,OS03G0831800,OS06G0143900,OS12G0538900,OS07G0693700,OS03G0715500,OS03G0335300,OS03G0227…
GO:BP	establishment of protein localization	GO:0045184	0.00153898	2.8127671787679036	680	1141	41	0.0359334	0.0184527	36851	OS06G0716700,OS02G0470600,OS03G0112101,OS08G0116700,OS09G0407950,OS01G0827600,OS09G0474300,OS02G0741500,OS07G0680000,OS03G0172000,OS07G0211000,OS03G0225500,OS08G0104300,OS12G0631100,OS10G0163100,OS11G0169100,OS07G0693400,OS05G0519400,OS10G0135200,OS04G0337201,OS11G0546000,OS05G0151400,OS10G0492000,OS12G0136200,OS09G0508300,OS11G0482100,OS12G0166500,OS01G0920200,OS03G0666500,OS10G0575200,OS02G0105…
GO:BP	gene silencing by RNA	GO:0031047	0.00162335	2.789587991092806	83	1141	11	0.00964067	0.00225231	36851	OS04G0615700,OS01G0147700,OS03G0583900,OS03G0789466,OS06G0729300,OS05G0545600,OS01G0275600,OS03G0121800,OS03G0749800,OS01G0909200,OS01G0633200
GO:BP	import into cell	GO:0098657	0.0016487	2.782858038749906	56	1141	9	0.00788782	0.00151963	36851	OS03G0112101,OS01G0634300,OS02G0810400,OS02G0793100,OS05G0200500,OS05G0579900,OS10G0575200,OS02G0622100,OS01G0772600
GO:BP	organic substance transport	GO:0071702	0.00178261	2.7489435160849096	1217	1141	63	0.0552147	0.0330249	36851	OS05G0336200,OS06G0210000,OS08G0492000,OS06G0716700,OS02G0470600,OS03G0112101,OS03G0254200,OS07G0151200,OS02G0211000,OS08G0116700,OS04G0438600,OS05G0100600,OS09G0407950,OS06G0228500,OS03G0326100,OS01G0221600,OS01G0827600,OS09G0474300,OS02G0741500,OS10G0579600,OS01G0857400,OS07G0680000,OS03G0172000,OS06G0589300,OS10G0412050,OS07G0211000,OS03G0225500,OS08G0104300,OS12G0631100,OS01G0700100,OS10G0163…
GO:BP	amide transport	GO:0042886	0.00196365	2.706936131132826	783	1141	45	0.0394391	0.0212477	36851	OS05G0336200,OS08G0492000,OS06G0716700,OS02G0470600,OS03G0112101,OS08G0116700,OS04G0438600,OS09G0407950,OS01G0827600,OS09G0474300,OS02G0741500,OS10G0579600,OS07G0680000,OS03G0172000,OS07G0211000,OS03G0225500,OS08G0104300,OS12G0631100,OS10G0163100,OS11G0169100,OS07G0693400,OS05G0519400,OS10G0135200,OS04G0337201,OS11G0546000,OS05G0151400,OS10G0492000,OS12G0136200,OS09G0508300,OS11G0482100,OS12G0166…
GO:BP	transcription, DNA-templated	GO:0006351	0.00200132	2.698683339074234	2268	1141	103	0.0902717	0.0615451	36851	OS01G0952500,OS07G0628500,OS01G0848400,OS07G0184800,OS06G0699600,OS07G0679700,OS01G0672201,OS12G0123800,OS08G0162100,OS02G0152800,OS10G0550066,OS01G0305900,OS02G0191600,OS07G0648266,OS02G0182100,OS06G0574450,OS11G0158832,OS05G0100500,OS02G0700300,OS03G0352450,OS01G0650800,OS06G0303700,OS01G0919400,OS10G0381800,OS06G0562700,OS12G0556300,OS09G0549450,OS06G0728700,OS06G0677800,OS05G0447580,OS08G0332…
GO:BP	intracellular protein transport	GO:0006886	0.00200132	2.698683339074234	532	1141	34	0.0297984	0.0144365	36851	OS02G0470600,OS03G0112101,OS08G0116700,OS09G0407950,OS09G0474300,OS02G0741500,OS07G0680000,OS03G0172000,OS03G0225500,OS12G0631100,OS11G0169100,OS07G0693400,OS10G0135200,OS04G0337201,OS11G0546000,OS05G0151400,OS10G0492000,OS12G0136200,OS09G0508300,OS11G0482100,OS12G0166500,OS01G0920200,OS03G0666500,OS10G0575200,OS02G0105100,OS08G0305300,OS08G0337700,OS01G0363900,OS06G0143900,OS12G0538900,OS11G0139…
GO:BP	phosphorus metabolic process	GO:0006793	0.00202309	2.6939846945776185	2952	1141	128	0.112182	0.0801064	36851	OS04G0122200,OS01G0117266,OS11G0670100,OS07G0646100,OS01G0201200,OS04G0369066,OS08G0230800,OS06G0581500,OS02G0154000,OS02G0603800,OS06G0727400,OS02G0664100,OS01G0117200,OS06G0586150,OS02G0277700,OS05G0332300,OS05G0358500,OS02G0227700,OS05G0582300,OS01G0818700,OS05G0317900,OS03G0827600,OS02G0590800,OS05G0462400,OS06G0181100,OS05G0104650,OS01G0878300,OS10G0564500,OS07G0283125,OS03G0399532,OS01G0824…
GO:BP	nucleic acid-templated transcription	GO:0097659	0.00225869	2.6461436051228664	2277	1141	103	0.0902717	0.0617894	36851	OS01G0952500,OS07G0628500,OS01G0848400,OS07G0184800,OS06G0699600,OS07G0679700,OS01G0672201,OS12G0123800,OS08G0162100,OS02G0152800,OS10G0550066,OS01G0305900,OS02G0191600,OS07G0648266,OS02G0182100,OS06G0574450,OS11G0158832,OS05G0100500,OS02G0700300,OS03G0352450,OS01G0650800,OS06G0303700,OS01G0919400,OS10G0381800,OS06G0562700,OS12G0556300,OS09G0549450,OS06G0728700,OS06G0677800,OS05G0447580,OS08G0332…
GO:BP	biosynthetic process	GO:0009058	0.00228685	2.640762114414607	5216	1141	207	0.18142	0.141543	36851	OS11G0489250,OS04G0171800,OS01G0952500,OS07G0628500,OS08G0140300,OS01G0848400,OS07G0184800,OS02G0603800,OS06G0699600,OS02G0664100,OS07G0679700,OS05G0386800,OS01G0672201,OS12G0123800,OS02G0247000,OS08G0162100,OS02G0152800,OS02G0123300,OS03G0650700,OS01G0834700,OS10G0550066,OS02G0611200,OS01G0305900,OS02G0191600,OS07G0648266,OS02G0182100,OS02G0704000,OS06G0574450,OS05G0582300,OS11G0158832,OS05G0100…
GO:BP	RNA biosynthetic process	GO:0032774	0.00228685	2.640762114414607	2280	1141	103	0.0902717	0.0618708	36851	OS01G0952500,OS07G0628500,OS01G0848400,OS07G0184800,OS06G0699600,OS07G0679700,OS01G0672201,OS12G0123800,OS08G0162100,OS02G0152800,OS10G0550066,OS01G0305900,OS02G0191600,OS07G0648266,OS02G0182100,OS06G0574450,OS11G0158832,OS05G0100500,OS02G0700300,OS03G0352450,OS01G0650800,OS06G0303700,OS01G0919400,OS10G0381800,OS06G0562700,OS12G0556300,OS09G0549450,OS06G0728700,OS06G0677800,OS05G0447580,OS08G0332…
GO:BP	peptide transport	GO:0015833	0.00228685	2.640762114414607	768	1141	44	0.0385627	0.0208407	36851	OS05G0336200,OS08G0492000,OS06G0716700,OS02G0470600,OS03G0112101,OS08G0116700,OS09G0407950,OS01G0827600,OS09G0474300,OS02G0741500,OS10G0579600,OS07G0680000,OS03G0172000,OS07G0211000,OS03G0225500,OS08G0104300,OS12G0631100,OS10G0163100,OS11G0169100,OS07G0693400,OS05G0519400,OS10G0135200,OS04G0337201,OS11G0546000,OS05G0151400,OS10G0492000,OS12G0136200,OS09G0508300,OS11G0482100,OS12G0166500,OS01G0920…
GO:BP	nucleocytoplasmic transport	GO:0006913	0.00228685	2.640762114414607	119	1141	13	0.0113935	0.00322922	36851	OS02G0202300,OS02G0741500,OS03G0172000,OS03G0225500,OS07G0693400,OS04G0337201,OS11G0546000,OS12G0136200,OS12G0166500,OS01G0920200,OS08G0305300,OS01G0363900,OS11G0139500
GO:BP	nuclear transport	GO:0051169	0.00228685	2.640762114414607	119	1141	13	0.0113935	0.00322922	36851	OS02G0202300,OS02G0741500,OS03G0172000,OS03G0225500,OS07G0693400,OS04G0337201,OS11G0546000,OS12G0136200,OS12G0166500,OS01G0920200,OS08G0305300,OS01G0363900,OS11G0139500
GO:BP	heterocycle biosynthetic process	GO:0018130	0.00240453	2.6189691289059853	2862	1141	124	0.108677	0.0776641	36851	OS01G0952500,OS07G0628500,OS08G0140300,OS01G0848400,OS07G0184800,OS02G0603800,OS06G0699600,OS07G0679700,OS01G0672201,OS12G0123800,OS08G0162100,OS02G0152800,OS10G0550066,OS02G0611200,OS01G0305900,OS02G0191600,OS07G0648266,OS02G0182100,OS06G0574450,OS11G0158832,OS05G0100500,OS02G0700300,OS03G0352450,OS01G0650800,OS06G0303700,OS05G0104650,OS01G0919400,OS10G0381800,OS06G0562700,OS12G0556300,OS09G0549…
GO:BP	response to stress	GO:0006950	0.00240453	2.6189691289059853	2073	1141	95	0.0832603	0.0562536	36851	OS03G0293000,OS08G0500700,OS12G0507700,OS09G0482600,OS02G0118875,OS11G0106400,OS03G0787300,OS05G0492600,OS12G0106000,OS12G0514500,OS02G0603800,OS07G0117000,OS08G0202400,OS06G0716700,OS02G0664100,OS04G0473900,OS12G0273300,OS09G0479500,OS10G0135100,OS11G0224900,OS02G0272900,OS11G0266500,OS11G0227200,OS03G0352450,OS08G0191700,OS08G0487800,OS04G0556000,OS11G0592100,OS05G0586200,OS01G0851700,OS05G0557…
GO:BP	energy reserve metabolic process	GO:0006112	0.00240453	2.6189691289059853	25	1141	6	0.00525855	0.000678408	36851	OS01G0851700,OS04G0409200,OS09G0553200,OS03G0712700,OS07G0662900,OS08G0520900
GO:BP	glycogen metabolic process	GO:0005977	0.00240453	2.6189691289059853	25	1141	6	0.00525855	0.000678408	36851	OS01G0851700,OS04G0409200,OS09G0553200,OS03G0712700,OS07G0662900,OS08G0520900
GO:BP	phosphate-containing compound metabolic process	GO:0006796	0.00248342	2.604949962411622	2921	1141	126	0.110429	0.0792651	36851	OS04G0122200,OS01G0117266,OS11G0670100,OS07G0646100,OS01G0201200,OS04G0369066,OS08G0230800,OS06G0581500,OS02G0154000,OS02G0603800,OS06G0727400,OS01G0117200,OS06G0586150,OS02G0277700,OS05G0332300,OS05G0358500,OS02G0227700,OS05G0582300,OS01G0818700,OS05G0317900,OS03G0827600,OS02G0590800,OS05G0462400,OS06G0181100,OS05G0104650,OS01G0878300,OS10G0564500,OS07G0283125,OS03G0399532,OS01G0824600,OS01G0668…
GO:BP	starch metabolic process	GO:0005982	0.00259001	2.586699267330473	48	1141	8	0.00701139	0.00130254	36851	OS04G0624600,OS02G0744700,OS11G0586300,OS03G0712700,OS05G0533600,OS08G0520900,OS02G0135900,OS07G0412100
GO:BP	nucleobase-containing compound biosynthetic process	GO:0034654	0.00337706	2.4714610032500772	2695	1141	117	0.102542	0.0731323	36851	OS01G0952500,OS07G0628500,OS01G0848400,OS07G0184800,OS02G0603800,OS06G0699600,OS07G0679700,OS01G0672201,OS12G0123800,OS08G0162100,OS02G0152800,OS10G0550066,OS02G0611200,OS01G0305900,OS02G0191600,OS07G0648266,OS02G0182100,OS06G0574450,OS11G0158832,OS05G0100500,OS02G0700300,OS03G0352450,OS01G0650800,OS06G0303700,OS05G0104650,OS01G0919400,OS10G0381800,OS06G0562700,OS12G0556300,OS09G0549450,OS06G0728…
GO:BP	nucleic acid phosphodiester bond hydrolysis	GO:0090305	0.00341037	2.4671983820831236	739	1141	42	0.0368098	0.0200537	36851	OS06G0499301,OS11G0155000,OS07G0621100,OS06G0493801,OS09G0327200,OS08G0340900,OS06G0565000,OS02G0266200,OS05G0275100,OS03G0583900,OS03G0849800,OS12G0233200,OS06G0690900,OS04G0488500,OS02G0110400,OS03G0165100,OS03G0333100,OS12G0456100,OS07G0472100,OS12G0631200,OS03G0840500,OS10G0421800,OS06G0621500,OS06G0506100,OS05G0534900,OS02G0824000,OS08G0112400,OS02G0722800,OS04G0520900,OS05G0592400,OS05G0294…
GO:BP	intracellular transport	GO:0046907	0.00341037	2.4671983820831236	669	1141	39	0.0341805	0.0181542	36851	OS02G0470600,OS03G0112101,OS08G0116700,OS09G0407950,OS02G0202300,OS09G0474300,OS03G0399532,OS02G0741500,OS07G0680000,OS03G0172000,OS03G0225500,OS12G0631100,OS11G0169100,OS07G0693400,OS10G0135200,OS04G0337201,OS11G0546000,OS05G0151400,OS10G0492000,OS12G0136200,OS09G0508300,OS11G0482100,OS12G0166500,OS01G0920200,OS03G0666500,OS12G0236700,OS10G0575200,OS02G0105100,OS08G0305300,OS12G0554400,OS08G0337…
GO:BP	chromatin organization	GO:0006325	0.00341037	2.4671983820831236	335	1141	24	0.0210342	0.00909066	36851	OS07G0184800,OS05G0100500,OS03G0352450,OS09G0362900,OS03G0225500,OS03G0151300,OS06G0645901,OS03G0800800,OS01G0775100,OS04G0446500,OS06G0731600,OS10G0457700,OS01G0367900,OS12G0613200,OS07G0477500,OS01G0893400,OS03G0596900,OS01G0920200,OS05G0150300,OS08G0493900,OS11G0572100,OS11G0602200,OS09G0515100,OS01G0109700
GO:BP	regulation of nucleobase-containing compound metabolic process	GO:0019219	0.00369754	2.4320870617092387	2266	1141	101	0.0885188	0.0614909	36851	OS01G0952500,OS07G0628500,OS01G0848400,OS07G0184800,OS06G0699600,OS07G0679700,OS01G0672201,OS12G0123800,OS08G0162100,OS10G0550066,OS01G0305900,OS02G0191600,OS07G0648266,OS02G0182100,OS11G0158832,OS05G0100500,OS02G0700300,OS01G0650800,OS06G0303700,OS01G0919400,OS10G0381800,OS06G0562700,OS12G0556300,OS09G0549450,OS06G0728700,OS06G0677800,OS05G0447580,OS08G0332800,OS08G0276200,OS06G0703900,OS02G0135…
GO:BP	glucan biosynthetic process	GO:0009250	0.00382034	2.417898047445959	127	1141	13	0.0113935	0.00344631	36851	OS05G0386800,OS02G0247000,OS02G0832400,OS04G0624600,OS04G0409200,OS02G0744700,OS09G0478100,OS03G0712700,OS05G0533600,OS08G0520900,OS02G0135900,OS07G0412100,OS03G0119500
GO:BP	establishment of localization in cell	GO:0051649	0.00424162	2.372467880025684	701	1141	40	0.035057	0.0190226	36851	OS02G0470600,OS03G0112101,OS08G0116700,OS09G0407950,OS02G0202300,OS09G0474300,OS03G0399532,OS02G0741500,OS07G0680000,OS03G0172000,OS03G0395300,OS03G0225500,OS12G0631100,OS11G0169100,OS07G0693400,OS10G0135200,OS04G0337201,OS11G0546000,OS05G0151400,OS10G0492000,OS12G0136200,OS09G0508300,OS11G0482100,OS12G0166500,OS01G0920200,OS03G0666500,OS12G0236700,OS10G0575200,OS02G0105100,OS08G0305300,OS12G0554…
GO:BP	maturation of SSU-rRNA	GO:0030490	0.00437552	2.358970634778902	66	1141	9	0.00788782	0.001791	36851	OS07G0203275,OS04G0592700,OS03G0333100,OS01G0104800,OS03G0598200,OS03G0343300,OS03G0151700,OS02G0736600,OS11G0298400
GO:BP	regulation of cellular macromolecule biosynthetic process	GO:2000112	0.00461376	2.3359447506614197	2311	1141	102	0.0893953	0.062712	36851	OS01G0952500,OS07G0628500,OS01G0848400,OS07G0184800,OS06G0699600,OS07G0679700,OS01G0672201,OS12G0123800,OS08G0162100,OS10G0550066,OS01G0305900,OS02G0191600,OS07G0648266,OS02G0182100,OS11G0158832,OS05G0100500,OS02G0700300,OS01G0650800,OS06G0303700,OS01G0919400,OS10G0381800,OS06G0562700,OS12G0556300,OS09G0549450,OS06G0728700,OS06G0677800,OS05G0447580,OS08G0332800,OS08G0276200,OS06G0703900,OS02G0135…
GO:BP	organelle organization	GO:0006996	0.00461376	2.3359447506614197	1534	1141	73	0.063979	0.0416271	36851	OS07G0184800,OS03G0859700,OS01G0805900,OS02G0697600,OS03G0650700,OS05G0100500,OS03G0352450,OS10G0578800,OS05G0537200,OS05G0100600,OS09G0407950,OS02G0202300,OS12G0606100,OS02G0741500,OS04G0675800,OS09G0362900,OS02G0830300,OS03G0172000,OS03G0686300,OS04G0566900,OS03G0395300,OS10G0412050,OS12G0628100,OS05G0501600,OS05G0113400,OS03G0225500,OS04G0538166,OS11G0168200,OS01G0646800,OS03G0151300,OS10G0376…
GO:BP	phosphorylation	GO:0016310	0.00535362	2.271352649173938	2159	1141	96	0.0841367	0.0585873	36851	OS04G0122200,OS01G0117266,OS11G0670100,OS01G0201200,OS04G0369066,OS08G0230800,OS06G0581500,OS02G0154000,OS02G0603800,OS06G0727400,OS01G0117200,OS06G0586150,OS02G0277700,OS05G0332300,OS02G0227700,OS05G0582300,OS01G0818700,OS05G0317900,OS03G0827600,OS02G0590800,OS06G0181100,OS01G0878300,OS10G0564500,OS07G0283125,OS03G0399532,OS01G0824600,OS01G0668901,OS11G0226201,OS12G0594200,OS07G0134800,OS01G0917…
GO:BP	regulation of transcription, DNA-templated	GO:0006355	0.00535362	2.271352649173938	2132	1141	95	0.0832603	0.0578546	36851	OS01G0952500,OS07G0628500,OS01G0848400,OS07G0184800,OS06G0699600,OS07G0679700,OS01G0672201,OS12G0123800,OS08G0162100,OS10G0550066,OS01G0305900,OS02G0191600,OS07G0648266,OS02G0182100,OS11G0158832,OS05G0100500,OS02G0700300,OS01G0650800,OS06G0303700,OS01G0919400,OS10G0381800,OS06G0562700,OS12G0556300,OS09G0549450,OS06G0728700,OS06G0677800,OS05G0447580,OS08G0332800,OS08G0276200,OS06G0703900,OS02G0135…
GO:BP	nitrogen compound transport	GO:0071705	0.00535362	2.271352649173938	979	1141	51	0.0446976	0.0265664	36851	OS05G0336200,OS06G0210000,OS08G0492000,OS02G0550800,OS06G0716700,OS02G0470600,OS03G0112101,OS03G0254200,OS08G0116700,OS04G0438600,OS09G0407950,OS06G0228500,OS01G0827600,OS09G0474300,OS02G0741500,OS10G0579600,OS01G0857400,OS07G0680000,OS03G0172000,OS07G0211000,OS03G0225500,OS08G0104300,OS12G0631100,OS10G0163100,OS06G0644700,OS11G0169100,OS07G0693400,OS05G0519400,OS10G0135200,OS04G0337201,OS11G0546…
GO:BP	regulation of macromolecule biosynthetic process	GO:0010556	0.00572773	2.2420171475838986	2328	1141	102	0.0893953	0.0631733	36851	OS01G0952500,OS07G0628500,OS01G0848400,OS07G0184800,OS06G0699600,OS07G0679700,OS01G0672201,OS12G0123800,OS08G0162100,OS10G0550066,OS01G0305900,OS02G0191600,OS07G0648266,OS02G0182100,OS11G0158832,OS05G0100500,OS02G0700300,OS01G0650800,OS06G0303700,OS01G0919400,OS10G0381800,OS06G0562700,OS12G0556300,OS09G0549450,OS06G0728700,OS06G0677800,OS05G0447580,OS08G0332800,OS08G0276200,OS06G0703900,OS02G0135…
GO:BP	glycoside catabolic process	GO:0016139	0.0058919	2.2297449103728884	5	1141	3	0.00262927	0.000135682	36851	OS08G0111200,OS11G0242100,OS10G0473400
GO:BP	glycoside metabolic process	GO:0016137	0.0058919	2.2297449103728884	5	1141	3	0.00262927	0.000135682	36851	OS08G0111200,OS11G0242100,OS10G0473400
GO:BP	regulation of RNA biosynthetic process	GO:2001141	0.00604913	2.2183074300986587	2145	1141	95	0.0832603	0.0582074	36851	OS01G0952500,OS07G0628500,OS01G0848400,OS07G0184800,OS06G0699600,OS07G0679700,OS01G0672201,OS12G0123800,OS08G0162100,OS10G0550066,OS01G0305900,OS02G0191600,OS07G0648266,OS02G0182100,OS11G0158832,OS05G0100500,OS02G0700300,OS01G0650800,OS06G0303700,OS01G0919400,OS10G0381800,OS06G0562700,OS12G0556300,OS09G0549450,OS06G0728700,OS06G0677800,OS05G0447580,OS08G0332800,OS08G0276200,OS06G0703900,OS02G0135…
GO:BP	regulation of nucleic acid-templated transcription	GO:1903506	0.00604913	2.2183074300986587	2145	1141	95	0.0832603	0.0582074	36851	OS01G0952500,OS07G0628500,OS01G0848400,OS07G0184800,OS06G0699600,OS07G0679700,OS01G0672201,OS12G0123800,OS08G0162100,OS10G0550066,OS01G0305900,OS02G0191600,OS07G0648266,OS02G0182100,OS11G0158832,OS05G0100500,OS02G0700300,OS01G0650800,OS06G0303700,OS01G0919400,OS10G0381800,OS06G0562700,OS12G0556300,OS09G0549450,OS06G0728700,OS06G0677800,OS05G0447580,OS08G0332800,OS08G0276200,OS06G0703900,OS02G0135…
GO:BP	cellular glucan metabolic process	GO:0006073	0.00604913	2.2183074300986587	209	1141	17	0.0148992	0.00567149	36851	OS05G0386800,OS02G0247000,OS02G0832400,OS01G0851700,OS04G0624600,OS04G0409200,OS02G0744700,OS11G0586300,OS09G0478100,OS09G0553200,OS03G0712700,OS05G0533600,OS07G0662900,OS08G0520900,OS02G0135900,OS07G0412100,OS03G0119500
GO:BP	histone modification	GO:0016570	0.00604913	2.2183074300986587	190	1141	16	0.0140228	0.0051559	36851	OS05G0100500,OS09G0362900,OS03G0151300,OS06G0645901,OS03G0800800,OS01G0775100,OS04G0446500,OS06G0731600,OS12G0613200,OS07G0477500,OS01G0893400,OS01G0920200,OS08G0493900,OS11G0572100,OS11G0602200,OS01G0109700
GO:BP	RNA export from nucleus	GO:0006405	0.00604913	2.2183074300986587	70	1141	9	0.00788782	0.00189954	36851	OS03G0172000,OS03G0225500,OS11G0546000,OS12G0136200,OS12G0166500,OS01G0920200,OS08G0305300,OS01G0363900,OS11G0139500
GO:BP	regulation of cellular biosynthetic process	GO:0031326	0.00700886	2.154352378533983	2347	1141	102	0.0893953	0.0636889	36851	OS01G0952500,OS07G0628500,OS01G0848400,OS07G0184800,OS06G0699600,OS07G0679700,OS01G0672201,OS12G0123800,OS08G0162100,OS10G0550066,OS01G0305900,OS02G0191600,OS07G0648266,OS02G0182100,OS11G0158832,OS05G0100500,OS02G0700300,OS01G0650800,OS06G0303700,OS01G0919400,OS10G0381800,OS06G0562700,OS12G0556300,OS09G0549450,OS06G0728700,OS06G0677800,OS05G0447580,OS08G0332800,OS08G0276200,OS06G0703900,OS02G0135…
GO:BP	covalent chromatin modification	GO:0016569	0.00701624	2.153895808530695	193	1141	16	0.0140228	0.00523731	36851	OS05G0100500,OS09G0362900,OS03G0151300,OS06G0645901,OS03G0800800,OS01G0775100,OS04G0446500,OS06G0731600,OS12G0613200,OS07G0477500,OS01G0893400,OS01G0920200,OS08G0493900,OS11G0572100,OS11G0602200,OS01G0109700
GO:BP	regulation of RNA metabolic process	GO:0051252	0.00721556	2.1417298851413027	2213	1141	97	0.0850131	0.0600526	36851	OS01G0952500,OS07G0628500,OS01G0848400,OS07G0184800,OS06G0699600,OS07G0679700,OS01G0672201,OS12G0123800,OS08G0162100,OS10G0550066,OS01G0305900,OS02G0191600,OS07G0648266,OS02G0182100,OS11G0158832,OS05G0100500,OS02G0700300,OS01G0650800,OS06G0303700,OS01G0919400,OS10G0381800,OS06G0562700,OS12G0556300,OS09G0549450,OS06G0728700,OS06G0677800,OS05G0447580,OS08G0332800,OS08G0276200,OS06G0703900,OS02G0135…
GO:BP	regulation of biosynthetic process	GO:0009889	0.00732744	2.1350477521238744	2352	1141	102	0.0893953	0.0638246	36851	OS01G0952500,OS07G0628500,OS01G0848400,OS07G0184800,OS06G0699600,OS07G0679700,OS01G0672201,OS12G0123800,OS08G0162100,OS10G0550066,OS01G0305900,OS02G0191600,OS07G0648266,OS02G0182100,OS11G0158832,OS05G0100500,OS02G0700300,OS01G0650800,OS06G0303700,OS01G0919400,OS10G0381800,OS06G0562700,OS12G0556300,OS09G0549450,OS06G0728700,OS06G0677800,OS05G0447580,OS08G0332800,OS08G0276200,OS06G0703900,OS02G0135…
GO:BP	glucan metabolic process	GO:0044042	0.00786483	2.1043104145389533	215	1141	17	0.0148992	0.00583431	36851	OS05G0386800,OS02G0247000,OS02G0832400,OS01G0851700,OS04G0624600,OS04G0409200,OS02G0744700,OS11G0586300,OS09G0478100,OS09G0553200,OS03G0712700,OS05G0533600,OS07G0662900,OS08G0520900,OS02G0135900,OS07G0412100,OS03G0119500
GO:BP	glucose metabolic process	GO:0006006	0.00843186	2.0740767788834455	59	1141	8	0.00701139	0.00160104	36851	OS02G0603800,OS04G0485300,OS05G0482700,OS02G0600400,OS03G0712700,OS12G0190000,OS01G0817700,OS04G0486600
GO:BP	aromatic compound biosynthetic process	GO:0019438	0.00908243	2.0417980436976557	2927	1141	122	0.106924	0.079428	36851	OS01G0952500,OS07G0628500,OS08G0140300,OS01G0848400,OS07G0184800,OS02G0603800,OS06G0699600,OS07G0679700,OS01G0672201,OS12G0123800,OS08G0162100,OS02G0152800,OS10G0550066,OS02G0611200,OS01G0305900,OS02G0191600,OS07G0648266,OS02G0182100,OS06G0574450,OS11G0158832,OS05G0100500,OS02G0700300,OS03G0352450,OS01G0650800,OS06G0303700,OS05G0104650,OS01G0919400,OS10G0381800,OS06G0562700,OS12G0556300,OS09G0549…
GO:BP	organonitrogen compound metabolic process	GO:1901564	0.00929881	2.0315727924430753	6251	1141	236	0.206836	0.169629	36851	OS04G0122200,OS01G0795200,OS01G0117266,OS11G0670100,OS11G0106400,OS08G0140300,OS07G0646100,OS01G0201200,OS04G0369066,OS08G0111200,OS08G0230800,OS06G0581500,OS02G0154000,OS02G0603800,OS06G0727400,OS02G0491400,OS02G0664100,OS08G0525600,OS01G0117200,OS06G0586150,OS02G0277700,OS03G0683900,OS01G0764000,OS06G0301300,OS02G0123300,OS04G0402500,OS03G0650700,OS01G0834700,OS05G0332300,OS02G0611200,OS05G0358…
GO:BP	nuclear export	GO:0051168	0.00929881	2.0315727924430753	75	1141	9	0.00788782	0.00203522	36851	OS03G0172000,OS03G0225500,OS11G0546000,OS12G0136200,OS12G0166500,OS01G0920200,OS08G0305300,OS01G0363900,OS11G0139500
GO:BP	valyl-tRNA aminoacylation	GO:0006438	0.00942522	2.025708327369707	13	1141	4	0.0035057	0.000352772	36851	OS09G0378300,OS06G0645400,OS09G0503400,OS03G0694900
GO:BP	cellular component organization	GO:0016043	0.0107883	1.9670470337125279	2439	1141	104	0.0911481	0.0661854	36851	OS03G0293000,OS07G0184800,OS11G0137300,OS03G0859700,OS05G0386800,OS01G0805900,OS02G0697600,OS03G0650700,OS02G0830801,OS05G0100500,OS03G0352450,OS04G0438600,OS10G0578800,OS05G0537200,OS05G0100600,OS09G0407950,OS02G0202300,OS03G0326100,OS12G0606100,OS02G0520750,OS01G0634300,OS02G0741500,OS07G0141600,OS04G0675800,OS09G0362900,OS02G0830300,OS10G0450900,OS03G0172000,OS03G0686300,OS04G0566900,OS02G0810…
GO:BP	sulfur compound biosynthetic process	GO:0044272	0.011927	1.9234692036480254	111	1141	11	0.00964067	0.00301213	36851	OS02G0611200,OS03G0815200,OS10G0419500,OS01G0142300,OS01G0931300,OS10G0363300,OS12G0566300,OS06G0564500,OS04G0404800,OS04G0614600,OS03G0161800
GO:BP	cellular protein metabolic process	GO:0044267	0.0128784	1.8901384759182955	4544	1141	177	0.155127	0.123307	36851	OS04G0122200,OS01G0117266,OS11G0670100,OS11G0106400,OS07G0646100,OS01G0201200,OS04G0369066,OS08G0230800,OS06G0581500,OS02G0154000,OS06G0727400,OS02G0491400,OS02G0664100,OS08G0525600,OS01G0117200,OS06G0586150,OS02G0277700,OS03G0683900,OS06G0301300,OS02G0123300,OS04G0402500,OS03G0650700,OS01G0834700,OS05G0332300,OS05G0358500,OS02G0227700,OS05G0582300,OS03G0179000,OS05G0100500,OS01G0818700,OS01G0943…
GO:BP	negative regulation of transcription by RNA polymerase II	GO:0000122	0.0133065	1.8759358757655569	36	1141	6	0.00525855	0.000976907	36851	OS05G0100500,OS03G0151300,OS06G0731600,OS11G0207100,OS11G0207000,OS01G0109700
GO:BP	cellular carbohydrate biosynthetic process	GO:0034637	0.0148383	1.8286164438747983	209	1141	16	0.0140228	0.00567149	36851	OS05G0386800,OS02G0247000,OS02G0832400,OS04G0624600,OS04G0409200,OS01G0919400,OS02G0744700,OS09G0478100,OS03G0712700,OS05G0533600,OS08G0520900,OS02G0135900,OS03G0192700,OS01G0376700,OS07G0412100,OS03G0119500
GO:BP	organic cyclic compound biosynthetic process	GO:1901362	0.0155232	1.8090181388570687	3033	1141	124	0.108677	0.0823044	36851	OS01G0952500,OS07G0628500,OS08G0140300,OS01G0848400,OS07G0184800,OS02G0603800,OS06G0699600,OS07G0679700,OS01G0672201,OS12G0123800,OS08G0162100,OS02G0152800,OS10G0550066,OS02G0611200,OS01G0305900,OS02G0191600,OS07G0648266,OS02G0182100,OS06G0574450,OS11G0158832,OS05G0100500,OS02G0700300,OS03G0352450,OS01G0650800,OS06G0303700,OS05G0104650,OS01G0919400,OS10G0381800,OS06G0562700,OS12G0556300,OS09G0549…
GO:BP	DNA demethylation	GO:0080111	0.0160117	1.795562563809429	7	1141	3	0.00262927	0.000189954	36851	OS06G0144000,OS08G0493900,OS09G0515100
GO:BP	ribosome-associated ubiquitin-dependent protein catabolic process	GO:1990116	0.0161146	1.7927791621923987	2	1141	2	0.00175285	5.42726e-05	36851	OS12G0564600,OS01G0977600
GO:BP	regulation of cellular metabolic process	GO:0031323	0.0163148	1.7874171100448324	2784	1141	115	0.100789	0.0755475	36851	OS01G0952500,OS07G0628500,OS01G0848400,OS07G0184800,OS06G0699600,OS07G0679700,OS01G0672201,OS12G0123800,OS08G0162100,OS06G0301300,OS10G0550066,OS01G0305900,OS02G0191600,OS07G0648266,OS02G0182100,OS11G0158832,OS05G0100500,OS02G0700300,OS01G0650800,OS05G0586200,OS06G0303700,OS05G0557400,OS01G0919400,OS10G0381800,OS06G0562700,OS12G0556300,OS09G0549450,OS06G0728700,OS10G0362300,OS06G0677800,OS05G0447…
GO:BP	ribonucleoprotein complex biogenesis	GO:0022613	0.0164936	1.7826846029196095	522	1141	30	0.0262927	0.0141652	36851	OS04G0625350,OS07G0203275,OS03G0650700,OS10G0572000,OS07G0141600,OS04G0592700,OS03G0333100,OS09G0413600,OS01G0104800,OS02G0557600,OS03G0598200,OS05G0502800,OS11G0168200,OS10G0495500,OS08G0519600,OS01G0375000,OS03G0343300,OS05G0102800,OS03G0151700,OS02G0227000,OS06G0644600,OS01G0120800,OS11G0546000,OS03G0203100,OS12G0166500,OS07G0124500,OS12G0167900,OS08G0379000,OS02G0736600,OS11G0298400
GO:BP	defense response	GO:0006952	0.0171466	1.7658222654318534	767	1141	40	0.035057	0.0208135	36851	OS02G0118875,OS05G0492600,OS02G0603800,OS07G0117000,OS08G0202400,OS12G0273300,OS09G0479500,OS10G0135100,OS11G0224900,OS02G0272900,OS11G0266500,OS11G0227200,OS11G0592100,OS05G0586200,OS05G0557400,OS07G0283125,OS01G0937300,OS11G0590700,OS12G0511400,OS03G0172000,OS11G0223201,OS06G0726600,OS09G0314200,OS11G0550500,OS11G0686400,OS07G0273900,OS01G0958700,OS05G0240200,OS08G0296700,OS09G0365300,OS10G0136…
GO:BP	RNA transport	GO:0050658	0.0171466	1.7658222654318534	83	1141	9	0.00788782	0.00225231	36851	OS03G0172000,OS03G0225500,OS11G0546000,OS12G0136200,OS12G0166500,OS01G0920200,OS08G0305300,OS01G0363900,OS11G0139500
GO:BP	establishment of RNA localization	GO:0051236	0.0171466	1.7658222654318534	83	1141	9	0.00788782	0.00225231	36851	OS03G0172000,OS03G0225500,OS11G0546000,OS12G0136200,OS12G0166500,OS01G0920200,OS08G0305300,OS01G0363900,OS11G0139500
GO:BP	nucleic acid transport	GO:0050657	0.0171466	1.7658222654318534	83	1141	9	0.00788782	0.00225231	36851	OS03G0172000,OS03G0225500,OS11G0546000,OS12G0136200,OS12G0166500,OS01G0920200,OS08G0305300,OS01G0363900,OS11G0139500
GO:BP	Golgi vesicle transport	GO:0048193	0.0184359	1.7343347245601533	175	1141	14	0.0122699	0.00474885	36851	OS01G0777000,OS05G0100600,OS07G0680000,OS10G0412050,OS11G0169100,OS05G0519400,OS11G0482100,OS02G0105100,OS12G0554400,OS03G0831800,OS06G0143900,OS12G0538900,OS03G0335300,OS03G0227000
GO:BP	phospholipid transport	GO:0015914	0.0186536	1.7292384956580884	39	1141	6	0.00525855	0.00105832	36851	OS04G0438600,OS05G0100600,OS03G0326100,OS10G0412050,OS03G0287100,OS11G0446500
GO:BP	cellular carbohydrate metabolic process	GO:0044262	0.0189547	1.7222821537548383	435	1141	26	0.022787	0.0118043	36851	OS05G0386800,OS02G0247000,OS04G0409900,OS02G0832400,OS01G0851700,OS04G0624600,OS04G0409200,OS01G0919400,OS02G0744700,OS11G0586300,OS05G0482700,OS09G0478100,OS09G0553200,OS03G0712700,OS05G0533600,OS01G0777700,OS07G0662900,OS03G0230500,OS08G0520900,OS06G0702500,OS02G0135900,OS01G0817700,OS03G0192700,OS01G0376700,OS07G0412100,OS03G0119500
GO:BP	protein phosphorylation	GO:0006468	0.0190925	1.7191378386697145	1718	1141	76	0.0666082	0.0466202	36851	OS04G0122200,OS01G0117266,OS11G0670100,OS01G0201200,OS04G0369066,OS08G0230800,OS06G0581500,OS02G0154000,OS06G0727400,OS01G0117200,OS06G0586150,OS02G0277700,OS05G0332300,OS02G0227700,OS05G0582300,OS01G0818700,OS05G0317900,OS02G0590800,OS06G0181100,OS01G0878300,OS10G0564500,OS07G0283125,OS01G0824600,OS01G0668901,OS11G0226201,OS12G0594200,OS01G0917500,OS10G0362300,OS09G0355400,OS02G0665800,OS11G0232…
GO:BP	ATP-dependent chromatin remodeling	GO:0043044	0.0190925	1.7191378386697145	16	1141	4	0.0035057	0.000434181	36851	OS03G0352450,OS10G0457700,OS01G0367900,OS05G0150300
GO:BP	cellular protein modification process	GO:0006464	0.0193638	1.713009452810825	3406	1141	136	0.119194	0.0924263	36851	OS04G0122200,OS01G0117266,OS11G0670100,OS11G0106400,OS07G0646100,OS01G0201200,OS04G0369066,OS08G0230800,OS06G0581500,OS02G0154000,OS06G0727400,OS02G0491400,OS02G0664100,OS08G0525600,OS01G0117200,OS06G0586150,OS02G0277700,OS03G0683900,OS04G0402500,OS05G0332300,OS05G0358500,OS02G0227700,OS05G0582300,OS03G0179000,OS05G0100500,OS01G0818700,OS01G0943800,OS01G0942900,OS05G0317900,OS02G0590800,OS12G0489…
GO:BP	protein modification process	GO:0036211	0.0193638	1.713009452810825	3406	1141	136	0.119194	0.0924263	36851	OS04G0122200,OS01G0117266,OS11G0670100,OS11G0106400,OS07G0646100,OS01G0201200,OS04G0369066,OS08G0230800,OS06G0581500,OS02G0154000,OS06G0727400,OS02G0491400,OS02G0664100,OS08G0525600,OS01G0117200,OS06G0586150,OS02G0277700,OS03G0683900,OS04G0402500,OS05G0332300,OS05G0358500,OS02G0227700,OS05G0582300,OS03G0179000,OS05G0100500,OS01G0818700,OS01G0943800,OS01G0942900,OS05G0317900,OS02G0590800,OS12G0489…
GO:BP	response to hormone	GO:0009725	0.0221409	1.6548049857427227	632	1141	34	0.0297984	0.0171501	36851	OS01G0952500,OS12G0106000,OS02G0603800,OS02G0182100,OS05G0586200,OS10G0564500,OS07G0155600,OS10G0362300,OS06G0677800,OS03G0172000,OS08G0520550,OS10G0510500,OS02G0796500,OS05G0186100,OS11G0148500,OS12G0613700,OS02G0164900,OS01G0203000,OS11G0523800,OS12G0145700,OS01G0144340,OS10G0579300,OS11G0206700,OS07G0477500,OS01G0893400,OS12G0479400,OS04G0485800,OS02G0290000,OS02G0622100,OS11G0572100,OS03G0356…
GO:BP	peptidyl-threonine phosphorylation	GO:0018107	0.0229484	1.6392480267741592	41	1141	6	0.00525855	0.00111259	36851	OS05G0332300,OS01G0824600,OS02G0810400,OS05G0200500,OS02G0622100,OS01G0772600
GO:BP	peptidyl-threonine modification	GO:0018210	0.0229484	1.6392480267741592	41	1141	6	0.00525855	0.00111259	36851	OS05G0332300,OS01G0824600,OS02G0810400,OS05G0200500,OS02G0622100,OS01G0772600
GO:BP	regulation of nitrogen compound metabolic process	GO:0051171	0.0235	1.6289314645780861	2768	1141	113	0.0990359	0.0751133	36851	OS01G0952500,OS07G0628500,OS01G0848400,OS07G0184800,OS06G0699600,OS07G0679700,OS01G0672201,OS12G0123800,OS08G0162100,OS06G0301300,OS10G0550066,OS01G0305900,OS02G0191600,OS07G0648266,OS02G0182100,OS11G0158832,OS05G0100500,OS02G0700300,OS01G0943800,OS01G0942900,OS01G0650800,OS06G0303700,OS01G0919400,OS10G0381800,OS06G0562700,OS12G0556300,OS09G0549450,OS06G0728700,OS10G0362300,OS06G0677800,OS05G0447…
GO:BP	RNA modification	GO:0009451	0.0235	1.6289314645780861	660	1141	35	0.0306748	0.01791	36851	OS06G0499301,OS07G0621100,OS06G0493801,OS09G0327200,OS08G0340900,OS06G0565000,OS02G0266200,OS05G0275100,OS06G0489500,OS03G0849800,OS12G0233200,OS06G0690900,OS04G0488500,OS02G0110400,OS03G0165100,OS12G0456100,OS08G0169700,OS04G0434300,OS07G0472100,OS05G0502800,OS10G0321700,OS03G0840500,OS10G0421800,OS06G0506100,OS12G0502200,OS05G0534900,OS02G0824000,OS08G0112400,OS04G0520900,OS05G0294600,OS12G0289…
GO:BP	protein-containing complex localization	GO:0031503	0.0246275	1.608580014458989	72	1141	8	0.00701139	0.00195381	36851	OS03G0225500,OS11G0546000,OS12G0136200,OS12G0166500,OS01G0920200,OS08G0305300,OS03G0831800,OS11G0139500
GO:BP	tRNA aminoacylation for protein translation	GO:0006418	0.0246275	1.608580014458989	72	1141	8	0.00701139	0.00195381	36851	OS09G0378300,OS03G0586800,OS05G0182800,OS06G0645400,OS12G0443700,OS09G0503400,OS03G0694900,OS10G0369000
GO:BP	chaperone-mediated protein folding	GO:0061077	0.025124	1.5999113679819155	89	1141	9	0.00788782	0.00241513	36851	OS02G0491400,OS03G0859700,OS08G0525600,OS08G0161900,OS06G0196900,OS01G0563000,OS03G0619400,OS08G0359500,OS02G0760300
GO:BP	protein metabolic process	GO:0019538	0.0256721	1.5905385750712657	5111	1141	193	0.16915	0.138694	36851	OS04G0122200,OS01G0795200,OS01G0117266,OS11G0670100,OS11G0106400,OS07G0646100,OS01G0201200,OS04G0369066,OS08G0230800,OS06G0581500,OS02G0154000,OS06G0727400,OS02G0491400,OS02G0664100,OS08G0525600,OS01G0117200,OS06G0586150,OS02G0277700,OS03G0683900,OS06G0301300,OS02G0123300,OS04G0402500,OS03G0650700,OS01G0834700,OS05G0332300,OS05G0358500,OS02G0227700,OS05G0582300,OS03G0179000,OS05G0100500,OS01G0818…
GO:BP	small molecule metabolic process	GO:0044281	0.0258335	1.5878164673637936	1580	1141	70	0.0613497	0.0428754	36851	OS08G0140300,OS06G0545900,OS02G0603800,OS02G0664100,OS02G0611200,OS02G0704000,OS08G0191700,OS05G0586200,OS11G0132600,OS05G0104650,OS05G0557400,OS03G0815200,OS12G0556300,OS07G0134800,OS04G0485300,OS01G0760600,OS01G0711000,OS10G0419500,OS06G0568200,OS05G0482700,OS02G0600400,OS08G0191200,OS09G0553200,OS09G0378300,OS11G0629500,OS03G0712700,OS11G0484400,OS05G0317200,OS11G0148500,OS01G0142300,OS01G0931…
GO:BP	response to endogenous stimulus	GO:0009719	0.0259245	1.5862893827202549	641	1141	34	0.0297984	0.0173944	36851	OS01G0952500,OS12G0106000,OS02G0603800,OS02G0182100,OS05G0586200,OS10G0564500,OS07G0155600,OS10G0362300,OS06G0677800,OS03G0172000,OS08G0520550,OS10G0510500,OS02G0796500,OS05G0186100,OS11G0148500,OS12G0613700,OS02G0164900,OS01G0203000,OS11G0523800,OS12G0145700,OS01G0144340,OS10G0579300,OS11G0206700,OS07G0477500,OS01G0893400,OS12G0479400,OS04G0485800,OS02G0290000,OS02G0622100,OS11G0572100,OS03G0356…
GO:BP	chromosome organization	GO:0051276	0.025941	1.586012545271169	568	1141	31	0.0271691	0.0154134	36851	OS07G0184800,OS05G0100500,OS03G0352450,OS02G0741500,OS09G0362900,OS03G0172000,OS03G0225500,OS01G0646800,OS03G0151300,OS06G0645901,OS03G0800800,OS01G0775100,OS04G0446500,OS06G0731600,OS10G0457700,OS01G0367900,OS05G0274200,OS06G0281400,OS12G0613200,OS07G0477500,OS01G0893400,OS03G0596900,OS01G0920200,OS01G0897800,OS05G0150300,OS08G0493900,OS11G0572100,OS08G0305300,OS11G0602200,OS09G0515100,OS01G0109…
GO:BP	cellular response to auxin stimulus	GO:0071365	0.0269074	1.5701279715155712	108	1141	10	0.00876424	0.00293072	36851	OS05G0586200,OS06G0677800,OS08G0520550,OS12G0613700,OS02G0164900,OS11G0523800,OS12G0479400,OS03G0356700,OS02G0557200,OS04G0442000
GO:BP	receptor-mediated endocytosis	GO:0006898	0.0269201	1.5699228022824987	18	1141	4	0.0035057	0.000488454	36851	OS03G0112101,OS01G0634300,OS05G0579900,OS10G0575200
GO:BP	aminoacyl-tRNA metabolism involved in translational fidelity	GO:0106074	0.0269201	1.5699228022824987	18	1141	4	0.0035057	0.000488454	36851	OS09G0378300,OS06G0645400,OS09G0503400,OS03G0694900
GO:BP	regulation of primary metabolic process	GO:0080090	0.0270514	1.5678108750419644	2787	1141	113	0.0990359	0.0756289	36851	OS01G0952500,OS07G0628500,OS01G0848400,OS07G0184800,OS06G0699600,OS07G0679700,OS01G0672201,OS12G0123800,OS08G0162100,OS06G0301300,OS10G0550066,OS01G0305900,OS02G0191600,OS07G0648266,OS02G0182100,OS11G0158832,OS05G0100500,OS02G0700300,OS01G0943800,OS01G0942900,OS01G0650800,OS06G0303700,OS01G0919400,OS10G0381800,OS06G0562700,OS12G0556300,OS09G0549450,OS06G0728700,OS06G0677800,OS05G0447580,OS08G0332…
GO:BP	carboxylic acid metabolic process	GO:0019752	0.0270514	1.5678108750419644	922	1141	45	0.0394391	0.0250197	36851	OS08G0140300,OS02G0603800,OS02G0704000,OS08G0191700,OS05G0586200,OS05G0104650,OS05G0557400,OS03G0815200,OS12G0556300,OS07G0134800,OS01G0760600,OS10G0419500,OS09G0378300,OS11G0629500,OS11G0484400,OS05G0317200,OS11G0148500,OS03G0248600,OS03G0586800,OS10G0363300,OS05G0182800,OS06G0645400,OS07G0630800,OS12G0566300,OS12G0145700,OS02G0274100,OS06G0564500,OS08G0366000,OS03G0179900,OS12G0443700,OS09G0503…
GO:BP	RNA localization	GO:0006403	0.0273771	1.5626128696134556	91	1141	9	0.00788782	0.0024694	36851	OS03G0172000,OS03G0225500,OS11G0546000,OS12G0136200,OS12G0166500,OS01G0920200,OS08G0305300,OS01G0363900,OS11G0139500
GO:BP	cellular polysaccharide biosynthetic process	GO:0033692	0.0274546	1.561385491165731	166	1141	13	0.0113935	0.00450463	36851	OS05G0386800,OS02G0247000,OS02G0832400,OS04G0624600,OS04G0409200,OS02G0744700,OS09G0478100,OS03G0712700,OS05G0533600,OS08G0520900,OS02G0135900,OS07G0412100,OS03G0119500
GO:BP	ceramide metabolic process	GO:0006672	0.0277946	1.5560395334113206	30	1141	5	0.00438212	0.000814089	36851	OS08G0111200,OS11G0242100,OS10G0473400,OS07G0444000,OS02G0656200
GO:BP	negative regulation of biological process	GO:0048519	0.0282305	1.5492810043112397	747	1141	38	0.0333041	0.0202708	36851	OS07G0184800,OS11G0155000,OS05G0100500,OS03G0352450,OS04G0615700,OS05G0586200,OS02G0631601,OS02G0741500,OS01G0147700,OS03G0583900,OS10G0362300,OS03G0789466,OS03G0419100,OS03G0151300,OS06G0729300,OS05G0545600,OS01G0375000,OS02G0722800,OS06G0731600,OS01G0275600,OS05G0274200,OS10G0556700,OS11G0207100,OS03G0121800,OS04G0485800,OS03G0749800,OS11G0572100,OS01G0909200,OS02G0656200,OS08G0305300,OS03G0356…
GO:BP	amino acid activation	GO:0043038	0.0287072	1.542009294841972	75	1141	8	0.00701139	0.00203522	36851	OS09G0378300,OS03G0586800,OS05G0182800,OS06G0645400,OS12G0443700,OS09G0503400,OS03G0694900,OS10G0369000
GO:BP	tRNA aminoacylation	GO:0043039	0.0287072	1.542009294841972	75	1141	8	0.00701139	0.00203522	36851	OS09G0378300,OS03G0586800,OS05G0182800,OS06G0645400,OS12G0443700,OS09G0503400,OS03G0694900,OS10G0369000
GO:BP	response to organic substance	GO:0010033	0.0294551	1.5308396686096382	775	1141	39	0.0341805	0.0210306	36851	OS01G0952500,OS12G0106000,OS02G0603800,OS02G0664100,OS02G0182100,OS05G0586200,OS10G0564500,OS07G0155600,OS10G0362300,OS06G0677800,OS03G0172000,OS08G0520550,OS10G0510500,OS02G0796500,OS06G0196900,OS05G0186100,OS11G0148500,OS12G0613700,OS02G0164900,OS01G0203000,OS02G0740300,OS11G0523800,OS12G0145700,OS01G0144340,OS10G0579300,OS11G0206700,OS07G0477500,OS01G0893400,OS12G0479400,OS04G0485800,OS02G0290…
GO:BP	oxoacid metabolic process	GO:0043436	0.0299956	1.5229428194613686	956	1141	46	0.0403155	0.0259423	36851	OS08G0140300,OS02G0603800,OS02G0704000,OS08G0191700,OS05G0586200,OS05G0104650,OS05G0557400,OS03G0815200,OS12G0556300,OS07G0134800,OS01G0760600,OS10G0419500,OS09G0378300,OS11G0629500,OS11G0484400,OS05G0317200,OS11G0148500,OS01G0142300,OS03G0248600,OS03G0586800,OS10G0363300,OS05G0182800,OS06G0645400,OS07G0630800,OS12G0566300,OS12G0145700,OS02G0274100,OS06G0564500,OS08G0366000,OS03G0179900,OS12G0443…
GO:BP	negative regulation of metabolic process	GO:0009892	0.0299956	1.5229428194613686	577	1141	31	0.0271691	0.0156576	36851	OS07G0184800,OS11G0155000,OS05G0100500,OS03G0352450,OS04G0615700,OS02G0631601,OS01G0147700,OS03G0583900,OS03G0789466,OS03G0419100,OS03G0151300,OS06G0729300,OS05G0545600,OS01G0375000,OS02G0722800,OS06G0731600,OS01G0275600,OS05G0274200,OS10G0556700,OS11G0207100,OS03G0121800,OS03G0749800,OS11G0572100,OS01G0909200,OS08G0305300,OS11G0207000,OS01G0633200,OS09G0515100,OS05G0243200,OS06G0669400,OS01G0109…
GO:BP	organic acid metabolic process	GO:0006082	0.0309863	1.5088304940677182	958	1141	46	0.0403155	0.0259966	36851	OS08G0140300,OS02G0603800,OS02G0704000,OS08G0191700,OS05G0586200,OS05G0104650,OS05G0557400,OS03G0815200,OS12G0556300,OS07G0134800,OS01G0760600,OS10G0419500,OS09G0378300,OS11G0629500,OS11G0484400,OS05G0317200,OS11G0148500,OS01G0142300,OS03G0248600,OS03G0586800,OS10G0363300,OS05G0182800,OS06G0645400,OS07G0630800,OS12G0566300,OS12G0145700,OS02G0274100,OS06G0564500,OS08G0366000,OS03G0179900,OS12G0443…
GO:BP	protein export from nucleus	GO:0006611	0.0310016	1.5086163892524533	60	1141	7	0.00613497	0.00162818	36851	OS11G0546000,OS12G0136200,OS12G0166500,OS01G0920200,OS08G0305300,OS01G0363900,OS11G0139500
GO:BP	energy derivation by oxidation of organic compounds	GO:0015980	0.0315279	1.5013053298968353	150	1141	12	0.0105171	0.00407045	36851	OS01G0851700,OS04G0409200,OS07G0134800,OS06G0684000,OS01G0760600,OS09G0553200,OS03G0712700,OS07G0662900,OS07G0630800,OS08G0366000,OS07G0645400,OS08G0520900
GO:BP	negative regulation of macromolecule metabolic process	GO:0010605	0.031989	1.4949989819248988	556	1141	30	0.0262927	0.0150878	36851	OS07G0184800,OS11G0155000,OS05G0100500,OS03G0352450,OS04G0615700,OS02G0631601,OS01G0147700,OS03G0583900,OS03G0789466,OS03G0419100,OS03G0151300,OS06G0729300,OS05G0545600,OS01G0375000,OS02G0722800,OS06G0731600,OS01G0275600,OS05G0274200,OS10G0556700,OS11G0207100,OS03G0121800,OS03G0749800,OS11G0572100,OS01G0909200,OS08G0305300,OS11G0207000,OS01G0633200,OS09G0515100,OS05G0243200,OS01G0109700
GO:BP	cellular amide metabolic process	GO:0043603	0.0337388	1.4718702529714986	1069	1141	50	0.0438212	0.0290087	36851	OS08G0111200,OS02G0603800,OS01G0764000,OS02G0123300,OS03G0650700,OS01G0834700,OS01G0369700,OS08G0340900,OS03G0815200,OS04G0628000,OS09G0413600,OS02G0557600,OS04G0538166,OS11G0168200,OS09G0378300,OS11G0242100,OS01G0655400,OS08G0519600,OS11G0484400,OS01G0183633,OS03G0586800,OS02G0218200,OS10G0363300,OS05G0182800,OS12G0406100,OS06G0645400,OS01G0120800,OS10G0473400,OS11G0546000,OS12G0566300,OS10G0556…
GO:BP	nuclear pore distribution	GO:0031081	0.0337388	1.4718702529714986	3	1141	2	0.00175285	8.14089e-05	36851	OS03G0225500,OS03G0831800
GO:BP	glucose catabolic process	GO:0006007	0.0337388	1.4718702529714986	3	1141	2	0.00175285	8.14089e-05	36851	OS05G0482700,OS01G0817700
GO:BP	nuclear pore localization	GO:0051664	0.0337388	1.4718702529714986	3	1141	2	0.00175285	8.14089e-05	36851	OS03G0225500,OS03G0831800
GO:BP	Golgi vesicle docking	GO:0048211	0.0337388	1.4718702529714986	3	1141	2	0.00175285	8.14089e-05	36851	OS05G0519400,OS12G0538900
GO:BP	ribosome biogenesis	GO:0042254	0.0343971	1.4634781417997433	416	1141	24	0.0210342	0.0112887	36851	OS04G0625350,OS07G0203275,OS03G0650700,OS10G0572000,OS04G0592700,OS03G0333100,OS09G0413600,OS01G0104800,OS03G0598200,OS05G0502800,OS11G0168200,OS10G0495500,OS08G0519600,OS01G0375000,OS03G0343300,OS03G0151700,OS02G0227000,OS06G0644600,OS11G0546000,OS03G0203100,OS12G0166500,OS12G0167900,OS02G0736600,OS11G0298400
GO:BP	ion transport	GO:0006811	0.0359919	1.4437949906288463	995	1141	47	0.0411919	0.0270006	36851	OS05G0336200,OS09G0428300,OS12G0106000,OS06G0210000,OS02G0550800,OS08G0206400,OS06G0680500,OS03G0254200,OS11G0660000,OS01G0719600,OS07G0151200,OS03G0673800,OS04G0438600,OS05G0100600,OS04G0556000,OS06G0228500,OS03G0326100,OS06G0700700,OS01G0221600,OS09G0271100,OS07G0155600,OS10G0579600,OS01G0857400,OS10G0362300,OS01G0711000,OS06G0568200,OS10G0412050,OS03G0111400,OS09G0563200,OS06G0103800,OS10G0513…
GO:BP	cellular lipid catabolic process	GO:0044242	0.0363358	1.4396657557876071	79	1141	8	0.00701139	0.00214377	36851	OS08G0111200,OS02G0704000,OS11G0242100,OS10G0473400,OS02G0274100,OS07G0444000,OS01G0348600,OS04G0615100
GO:BP	metal ion transport	GO:0030001	0.0367554	1.4346790640853226	326	1141	20	0.0175285	0.00884644	36851	OS12G0106000,OS08G0206400,OS01G0719600,OS04G0556000,OS06G0700700,OS09G0271100,OS07G0155600,OS10G0362300,OS03G0111400,OS09G0563200,OS06G0103800,OS09G0376900,OS03G0574900,OS02G0176700,OS05G0534600,OS10G0532300,OS12G0136900,OS10G0209700,OS06G0527100,OS12G0586600
GO:BP	protein targeting to vacuole	GO:0006623	0.037896	1.4214069458129635	33	1141	5	0.00438212	0.000895498	36851	OS02G0470600,OS08G0116700,OS07G0680000,OS10G0575200,OS03G0335300
GO:BP	cellular response to hormone stimulus	GO:0032870	0.0383282	1.4164820365814217	397	1141	23	0.0201578	0.0107731	36851	OS01G0952500,OS02G0603800,OS02G0182100,OS05G0586200,OS10G0564500,OS07G0155600,OS10G0362300,OS06G0677800,OS08G0520550,OS02G0796500,OS05G0186100,OS11G0148500,OS12G0613700,OS02G0164900,OS01G0203000,OS11G0523800,OS12G0145700,OS12G0479400,OS04G0485800,OS03G0356700,OS02G0557200,OS08G0359500,OS04G0442000
GO:BP	carbohydrate metabolic process	GO:0005975	0.0411455	1.3856779146963212	1083	1141	50	0.0438212	0.0293886	36851	OS07G0539900,OS01G0940800,OS06G0545900,OS02G0603800,OS05G0386800,OS02G0247000,OS04G0409900,OS05G0365700,OS10G0465700,OS02G0832400,OS01G0851700,OS11G0132600,OS04G0624600,OS04G0409200,OS01G0919400,OS04G0485300,OS07G0456700,OS02G0744700,OS11G0586300,OS05G0482700,OS07G0168600,OS02G0600400,OS09G0478100,OS09G0553200,OS11G0550500,OS03G0712700,OS11G0148500,OS05G0533600,OS01G0777700,OS03G0248600,OS12G0406…
GO:BP	ribosomal small subunit biogenesis	GO:0042274	0.0416732	1.3801433579181248	99	1141	9	0.00788782	0.00268649	36851	OS07G0203275,OS04G0592700,OS03G0333100,OS01G0104800,OS03G0598200,OS03G0343300,OS03G0151700,OS02G0736600,OS11G0298400
GO:BP	demethylation	GO:0070988	0.042329	1.3733619697959973	34	1141	5	0.00438212	0.000922634	36851	OS06G0144000,OS03G0151300,OS06G0731600,OS08G0493900,OS09G0515100
GO:BP	thioester biosynthetic process	GO:0035384	0.0453449	1.3434710780093688	11	1141	3	0.00262927	0.000298499	36851	OS10G0363300,OS12G0566300,OS04G0404800
GO:BP	DNA dealkylation	GO:0035510	0.0453449	1.3434710780093688	11	1141	3	0.00262927	0.000298499	36851	OS06G0144000,OS08G0493900,OS09G0515100
GO:BP	acyl-CoA biosynthetic process	GO:0071616	0.0453449	1.3434710780093688	11	1141	3	0.00262927	0.000298499	36851	OS10G0363300,OS12G0566300,OS04G0404800
GO:BP	monosaccharide metabolic process	GO:0005996	0.0471432	1.3265812983511125	160	1141	12	0.0105171	0.00434181	36851	OS06G0545900,OS02G0603800,OS11G0132600,OS04G0485300,OS05G0482700,OS02G0600400,OS03G0712700,OS02G0195500,OS12G0190000,OS05G0595100,OS01G0817700,OS04G0486600
GO:BP	ionotropic glutamate receptor signaling pathway	GO:0035235	0.0471432	1.3265812983511125	22	1141	4	0.0035057	0.000596999	36851	OS09G0428300,OS06G0680500,OS04G0585200,OS07G0522600
GO:BP	glutamate receptor signaling pathway	GO:0007215	0.0471432	1.3265812983511125	22	1141	4	0.0035057	0.000596999	36851	OS09G0428300,OS06G0680500,OS04G0585200,OS07G0522600
GO:BP	cellular response to endogenous stimulus	GO:0071495	0.047508	1.3232332382486127	406	1141	23	0.0201578	0.0110173	36851	OS01G0952500,OS02G0603800,OS02G0182100,OS05G0586200,OS10G0564500,OS07G0155600,OS10G0362300,OS06G0677800,OS08G0520550,OS02G0796500,OS05G0186100,OS11G0148500,OS12G0613700,OS02G0164900,OS01G0203000,OS11G0523800,OS12G0145700,OS12G0479400,OS04G0485800,OS03G0356700,OS02G0557200,OS08G0359500,OS04G0442000

## Sheet: Roots - Up
Supplementary Table 4 : Gene Ontology term enrichment analysis of commonly regulated genes by each strains
source	term_name	term_id	adjusted_p_value	negative_log10_of_adjusted_p_value	term_size	query_size	intersection_size		effective_domain_size	intersections
GO:BP	developmental process	GO:0032502	0.03204958015669461	1.4941776552816715	1326	49	7	0.142857	36851	OS07G0519100,OS02G0771600,OS07G0520100,OS01G0132766,OS02G0255500,OS07G0524000,OS07G0603300
GO:BP	brassinosteroid metabolic process	GO:0016131	0.03204958015669461	1.4941776552816715	43	49	2	0.0408163	36851	OS07G0519100,OS07G0520100
GO:BP	brassinosteroid biosynthetic process	GO:0016132	0.03204958015669461	1.4941776552816715	38	49	2	0.0408163	36851	OS07G0519100,OS07G0520100
GO:BP	brassinosteroid homeostasis	GO:0010268	0.03204958015669461	1.4941776552816715	41	49	2	0.0408163	36851	OS07G0519100,OS07G0520100
GO:BP	cellular response to hormone stimulus	GO:0032870	0.03204958015669461	1.4941776552816715	397	49	4	0.0816327	36851	OS04G0673300,OS01G0132766,OS02G0255500,OS05G0155200
GO:BP	hormone metabolic process	GO:0042445	0.03204958015669461	1.4941776552816715	187	49	3	0.0612245	36851	OS07G0519100,OS02G0771600,OS07G0520100
GO:BP	hormone biosynthetic process	GO:0042446	0.03204958015669461	1.4941776552816715	135	49	3	0.0612245	36851	OS07G0519100,OS02G0771600,OS07G0520100
GO:BP	seed germination	GO:0009845	0.03204958015669461	1.4941776552816715	46	49	2	0.0408163	36851	OS02G0771600,OS02G0255500
GO:BP	hormone-mediated signaling pathway	GO:0009755	0.03204958015669461	1.4941776552816715	372	49	4	0.0816327	36851	OS04G0673300,OS01G0132766,OS02G0255500,OS05G0155200
GO:BP	cytokinin-activated signaling pathway	GO:0009736	0.03204958015669461	1.4941776552816715	51	49	2	0.0408163	36851	OS04G0673300,OS01G0132766
GO:BP	response to cytokinin	GO:0009735	0.03204958015669461	1.4941776552816715	94	49	3	0.0612245	36851	OS02G0771600,OS04G0673300,OS01G0132766
GO:BP	anatomical structure development	GO:0048856	0.03204958015669461	1.4941776552816715	1086	49	7	0.142857	36851	OS07G0519100,OS02G0771600,OS07G0520100,OS01G0132766,OS02G0255500,OS07G0524000,OS07G0603300
GO:BP	lipid homeostasis	GO:0055088	0.03204958015669461	1.4941776552816715	51	49	2	0.0408163	36851	OS07G0519100,OS07G0520100
GO:BP	phytosteroid biosynthetic process	GO:0016129	0.03204958015669461	1.4941776552816715	44	49	2	0.0408163	36851	OS07G0519100,OS07G0520100
GO:BP	response to hormone	GO:0009725	0.03204958015669461	1.4941776552816715	632	49	5	0.102041	36851	OS02G0771600,OS04G0673300,OS01G0132766,OS02G0255500,OS05G0155200
GO:BP	biological regulation	GO:0065007	0.03204958015669461	1.4941776552816715	5764	49	17	0.346939	36851	OS12G0589000,OS07G0519100,OS04G0437000,OS02G0771600,OS04G0673300,OS07G0520100,OS04G0610900,OS07G0257200,OS10G0561800,OS01G0132766,OS10G0534900,OS07G0602900,OS08G0332600,OS02G0255500,OS03G0725800,OS05G0155200,OS07G0603300
GO:BP	response to endogenous stimulus	GO:0009719	0.03204958015669461	1.4941776552816715	641	49	5	0.102041	36851	OS02G0771600,OS04G0673300,OS01G0132766,OS02G0255500,OS05G0155200
GO:BP	cellular response to organic substance	GO:0071310	0.03204958015669461	1.4941776552816715	464	49	5	0.102041	36851	OS02G0771600,OS04G0673300,OS01G0132766,OS02G0255500,OS05G0155200
GO:BP	cellular response to cytokinin stimulus	GO:0071368	0.03204958015669461	1.4941776552816715	52	49	2	0.0408163	36851	OS04G0673300,OS01G0132766
GO:BP	cell communication	GO:0007154	0.03204958015669461	1.4941776552816715	1950	49	9	0.183673	36851	OS04G0633900,OS09G0551251,OS04G0673300,OS04G0610900,OS01G0132766,OS07G0602900,OS08G0332600,OS02G0255500,OS05G0155200
GO:BP	cellular response to lipid	GO:0071396	0.03204958015669461	1.4941776552816715	185	49	3	0.0612245	36851	OS02G0771600,OS01G0132766,OS02G0255500
GO:BP	cellular response to endogenous stimulus	GO:0071495	0.03204958015669461	1.4941776552816715	406	49	4	0.0816327	36851	OS04G0673300,OS01G0132766,OS02G0255500,OS05G0155200
GO:BP	seedling development	GO:0090351	0.03204958015669461	1.4941776552816715	52	49	2	0.0408163	36851	OS02G0771600,OS02G0255500
GO:BP	response to ethylene	GO:0009723	0.03204958015669461	1.4941776552816715	45	49	2	0.0408163	36851	OS02G0771600,OS05G0155200
GO:BP	phytosteroid metabolic process	GO:0016128	0.03204958015669461	1.4941776552816715	49	49	2	0.0408163	36851	OS07G0519100,OS07G0520100
GO:BP	biological_process	GO:0008150	0.03414433524872692	1.4666813380816144	17854	49	34	0.693878	36851	OS11G0151500,OS06G0573900,OS03G0197100,OS04G0633900,OS09G0551251,OS12G0589000,OS10G0162856,OS03G0234100,OS07G0519100,OS04G0491200,OS05G0493800,OS04G0437000,OS02G0771600,OS01G0818700,OS01G0370000,OS05G0586500,OS04G0673300,OS03G0827600,OS02G0153700,OS07G0520100,OS04G0610900,OS07G0257200,OS10G0561800,OS01G0132766,OS10G0534900,OS01G0323600,OS07G0602900,OS08G0332600,OS02G0255500,OS07G0524000,OS04G0501…
GO:BP	cellular response to acid chemical	GO:0071229	0.0373588180603996	1.427606872216201	210	49	3	0.0612245	36851	OS02G0771600,OS01G0132766,OS02G0255500
GO:BP	response to fatty acid	GO:0070542	0.04143196834217217	1.382664433830894	3	49	1	0.0204082	36851	OS02G0771600
GO:BP	cellular response to chemical stimulus	GO:0070887	0.04143196834217217	1.382664433830894	773	49	5	0.102041	36851	OS02G0771600,OS04G0673300,OS01G0132766,OS02G0255500,OS05G0155200
GO:BP	multicellular organismal process	GO:0032501	0.04143196834217217	1.382664433830894	1139	49	6	0.122449	36851	OS04G0633900,OS09G0551251,OS07G0519100,OS02G0771600,OS07G0520100,OS02G0255500
GO:BP	cellular response to fatty acid	GO:0071398	0.04143196834217217	1.382664433830894	3	49	1	0.0204082	36851	OS02G0771600
GO:BP	phosphorelay signal transduction system	GO:0000160	0.04143196834217217	1.382664433830894	67	49	2	0.0408163	36851	OS04G0673300,OS05G0155200
GO:BP	regulation of hormone levels	GO:0010817	0.04143196834217217	1.382664433830894	232	49	3	0.0612245	36851	OS07G0519100,OS02G0771600,OS07G0520100
GO:BP	detection of ethylene stimulus	GO:0009727	0.04143196834217217	1.382664433830894	3	49	1	0.0204082	36851	OS02G0771600
GO:BP	response to organic substance	GO:0010033	0.04143196834217217	1.382664433830894	775	49	5	0.102041	36851	OS02G0771600,OS04G0673300,OS01G0132766,OS02G0255500,OS05G0155200
GO:BP	regulation of biological process	GO:0050789	0.047349063744372095	1.3246886040878012	5022	49	14	0.285714	36851	OS12G0589000,OS04G0437000,OS02G0771600,OS04G0673300,OS04G0610900,OS10G0561800,OS01G0132766,OS10G0534900,OS07G0602900,OS08G0332600,OS02G0255500,OS03G0725800,OS05G0155200,OS07G0603300
GO:BP	oxygen transport	GO:0015671	0.049089592899360636	1.3090105694950454	6	49	1	0.0204082	36851	OS03G0234100
GO:BP	detection of chemical stimulus	GO:0009593	0.049089592899360636	1.3090105694950454	7	49	1	0.0204082	36851	OS02G0771600
GO:BP	biosynthetic process	GO:0009058	0.049089592899360636	1.3090105694950454	5216	49	14	0.285714	36851	OS12G0589000,OS10G0162856,OS07G0519100,OS04G0437000,OS02G0771600,OS01G0370000,OS04G0673300,OS07G0520100,OS10G0561800,OS01G0132766,OS10G0534900,OS01G0323600,OS07G0602900,OS03G0725800
GO:BP	steroid metabolic process	GO:0008202	0.049089592899360636	1.3090105694950454	106	49	2	0.0408163	36851	OS07G0519100,OS07G0520100
GO:BP	cell recognition	GO:0008037	0.049089592899360636	1.3090105694950454	115	49	2	0.0408163	36851	OS04G0633900,OS09G0551251
GO:BP	signal transduction	GO:0007165	0.049089592899360636	1.3090105694950454	1775	49	7	0.142857	36851	OS04G0673300,OS04G0610900,OS01G0132766,OS07G0602900,OS08G0332600,OS02G0255500,OS05G0155200
GO:BP	steroid biosynthetic process	GO:0006694	0.049089592899360636	1.3090105694950454	92	49	2	0.0408163	36851	OS07G0519100,OS07G0520100
GO:BP	S-adenosylmethionine biosynthetic process	GO:0006556	0.049089592899360636	1.3090105694950454	6	49	1	0.0204082	36851	OS01G0323600
GO:BP	regulation of transcription, DNA-templated	GO:0006355	0.049089592899360636	1.3090105694950454	2132	49	8	0.163265	36851	OS12G0589000,OS04G0437000,OS04G0673300,OS10G0561800,OS01G0132766,OS10G0534900,OS07G0602900,OS03G0725800
GO:BP	cellular response to nitric oxide	GO:0071732	0.049089592899360636	1.3090105694950454	6	49	1	0.0204082	36851	OS02G0771600
GO:BP	detection of hormone stimulus	GO:0009720	0.049089592899360636	1.3090105694950454	5	49	1	0.0204082	36851	OS02G0771600
GO:BP	regulation of primary metabolic process	GO:0080090	0.049089592899360636	1.3090105694950454	2787	49	9	0.183673	36851	OS12G0589000,OS04G0437000,OS04G0673300,OS10G0561800,OS01G0132766,OS10G0534900,OS07G0602900,OS02G0255500,OS03G0725800
GO:BP	transcription, DNA-templated	GO:0006351	0.049089592899360636	1.3090105694950454	2268	49	8	0.163265	36851	OS12G0589000,OS04G0437000,OS04G0673300,OS10G0561800,OS01G0132766,OS10G0534900,OS07G0602900,OS03G0725800
GO:BP	response to bronchodilator	GO:0097366	0.049089592899360636	1.3090105694950454	7	49	1	0.0204082	36851	OS02G0771600
GO:BP	nucleic acid-templated transcription	GO:0097659	0.049089592899360636	1.3090105694950454	2277	49	8	0.163265	36851	OS12G0589000,OS04G0437000,OS04G0673300,OS10G0561800,OS01G0132766,OS10G0534900,OS07G0602900,OS03G0725800
GO:BP	organic cyclic compound biosynthetic process	GO:1901362	0.049089592899360636	1.3090105694950454	3033	49	10	0.204082	36851	OS12G0589000,OS07G0519100,OS04G0437000,OS04G0673300,OS07G0520100,OS10G0561800,OS01G0132766,OS10G0534900,OS07G0602900,OS03G0725800
GO:BP	organic substance biosynthetic process	GO:1901576	0.049089592899360636	1.3090105694950454	4929	49	13	0.265306	36851	OS12G0589000,OS07G0519100,OS04G0437000,OS02G0771600,OS01G0370000,OS04G0673300,OS07G0520100,OS10G0561800,OS01G0132766,OS10G0534900,OS01G0323600,OS07G0602900,OS03G0725800
GO:BP	cellular response to oxygen-containing compound	GO:1901701	0.049089592899360636	1.3090105694950454	293	49	3	0.0612245	36851	OS02G0771600,OS01G0132766,OS02G0255500
GO:BP	regulation of nucleic acid-templated transcription	GO:1903506	0.049089592899360636	1.3090105694950454	2145	49	8	0.163265	36851	OS12G0589000,OS04G0437000,OS04G0673300,OS10G0561800,OS01G0132766,OS10G0534900,OS07G0602900,OS03G0725800
GO:BP	negative regulation of protein serine/threonine phosphatase activity	GO:1905183	0.049089592899360636	1.3090105694950454	4	49	1	0.0204082	36851	OS02G0255500
GO:BP	response to nitric oxide	GO:0071731	0.049089592899360636	1.3090105694950454	7	49	1	0.0204082	36851	OS02G0771600
GO:BP	detection of endogenous stimulus	GO:0009726	0.049089592899360636	1.3090105694950454	5	49	1	0.0204082	36851	OS02G0771600
GO:BP	regulation of monopolar cell growth	GO:0051513	0.049089592899360636	1.3090105694950454	4	49	1	0.0204082	36851	OS07G0603300
GO:BP	sterol metabolic process	GO:0016125	0.049089592899360636	1.3090105694950454	84	49	2	0.0408163	36851	OS07G0519100,OS07G0520100
GO:BP	gas transport	GO:0015669	0.049089592899360636	1.3090105694950454	6	49	1	0.0204082	36851	OS03G0234100
GO:BP	regulation of nucleobase-containing compound metabolic process	GO:0019219	0.049089592899360636	1.3090105694950454	2266	49	8	0.163265	36851	OS12G0589000,OS04G0437000,OS04G0673300,OS10G0561800,OS01G0132766,OS10G0534900,OS07G0602900,OS03G0725800
GO:BP	signaling	GO:0023052	0.049089592899360636	1.3090105694950454	1784	49	7	0.142857	36851	OS04G0673300,OS04G0610900,OS01G0132766,OS07G0602900,OS08G0332600,OS02G0255500,OS05G0155200
GO:BP	regulation of cellular metabolic process	GO:0031323	0.049089592899360636	1.3090105694950454	2784	49	9	0.183673	36851	OS12G0589000,OS04G0437000,OS04G0673300,OS10G0561800,OS01G0132766,OS10G0534900,OS07G0602900,OS02G0255500,OS03G0725800
GO:BP	xylem development	GO:0010089	0.049089592899360636	1.3090105694950454	8	49	1	0.0204082	36851	OS07G0524000
GO:BP	regulation of cellular macromolecule biosynthetic process	GO:2000112	0.049089592899360636	1.3090105694950454	2311	49	8	0.163265	36851	OS12G0589000,OS04G0437000,OS04G0673300,OS10G0561800,OS01G0132766,OS10G0534900,OS07G0602900,OS03G0725800
GO:BP	RNA biosynthetic process	GO:0032774	0.049089592899360636	1.3090105694950454	2280	49	8	0.163265	36851	OS12G0589000,OS04G0437000,OS04G0673300,OS10G0561800,OS01G0132766,OS10G0534900,OS07G0602900,OS03G0725800
GO:BP	response to lipid	GO:0033993	0.049089592899360636	1.3090105694950454	294	49	3	0.0612245	36851	OS02G0771600,OS01G0132766,OS02G0255500
GO:BP	transmembrane transport	GO:0055085	0.049089592899360636	1.3090105694950454	1373	49	6	0.122449	36851	OS11G0151500,OS03G0197100,OS04G0491200,OS05G0493800,OS05G0586500,OS07G0257200
GO:BP	response to chemical	GO:0042221	0.049089592899360636	1.3090105694950454	1410	49	6	0.122449	36851	OS03G0234100,OS02G0771600,OS04G0673300,OS01G0132766,OS02G0255500,OS05G0155200
GO:BP	monopolar cell growth	GO:0042814	0.049089592899360636	1.3090105694950454	4	49	1	0.0204082	36851	OS07G0603300
GO:BP	recognition of pollen	GO:0048544	0.049089592899360636	1.3090105694950454	115	49	2	0.0408163	36851	OS04G0633900,OS09G0551251
GO:BP	chemical homeostasis	GO:0048878	0.049089592899360636	1.3090105694950454	337	49	3	0.0612245	36851	OS07G0519100,OS07G0520100,OS07G0257200
GO:BP	regulation of cellular process	GO:0050794	0.049089592899360636	1.3090105694950454	4630	49	13	0.265306	36851	OS12G0589000,OS04G0437000,OS04G0673300,OS04G0610900,OS10G0561800,OS01G0132766,OS10G0534900,OS07G0602900,OS08G0332600,OS02G0255500,OS03G0725800,OS05G0155200,OS07G0603300
GO:BP	regulation of nitrogen compound metabolic process	GO:0051171	0.049089592899360636	1.3090105694950454	2768	49	9	0.183673	36851	OS12G0589000,OS04G0437000,OS04G0673300,OS10G0561800,OS01G0132766,OS10G0534900,OS07G0602900,OS02G0255500,OS03G0725800
GO:BP	regulation of RNA metabolic process	GO:0051252	0.049089592899360636	1.3090105694950454	2213	49	8	0.163265	36851	OS12G0589000,OS04G0437000,OS04G0673300,OS10G0561800,OS01G0132766,OS10G0534900,OS07G0602900,OS03G0725800
GO:BP	regulation of unidimensional cell growth	GO:0051510	0.049089592899360636	1.3090105694950454	8	49	1	0.0204082	36851	OS07G0603300
GO:BP	positive regulation of seed germination	GO:0010030	0.049089592899360636	1.3090105694950454	8	49	1	0.0204082	36851	OS02G0771600
GO:BP	regulation of RNA biosynthetic process	GO:2001141	0.049089592899360636	1.3090105694950454	2145	49	8	0.163265	36851	OS12G0589000,OS04G0437000,OS04G0673300,OS10G0561800,OS01G0132766,OS10G0534900,OS07G0602900,OS03G0725800
GO:BP	pollen-pistil interaction	GO:0009875	0.049312708962556	1.307041139120163	118	49	2	0.0408163	36851	OS04G0633900,OS09G0551251
GO:BP	regulation of macromolecule biosynthetic process	GO:0010556	0.04986025218154438	1.3022455292663369	2328	49	8	0.163265	36851	OS12G0589000,OS04G0437000,OS04G0673300,OS10G0561800,OS01G0132766,OS10G0534900,OS07G0602900,OS03G0725800

## Sheet: Roots - Down
Supplementary Table 4 : Gene Ontology term enrichment analysis of commonly regulated genes by each strains
source	term_name	term_id	adjusted_p_value	negative_log10_of_adjusted_p_value	term_size	query_size	intersection_size		effective_domain_size	intersections
GO:BP	oxidation-reduction process	GO:0055114	2.26657e-12	11.644631653238632	2093	205	45	0.219512	36851	OS04G0612700,OS06G0104900,OS02G0811800,OS02G0808800,OS09G0471000,OS01G0127000,OS08G0480400,OS06G0695200,OS03G0655100,OS02G0318100,OS06G0695300,OS01G0895300,OS07G0638400,OS03G0369000,OS07G0531400,OS12G0617400,OS04G0339400,OS01G0895200,OS04G0345800,OS05G0560900,OS11G0428800,OS05G0158600,OS03G0122300,OS01G0185500,OS06G0216300,OS07G0190800,OS12G0442800,OS03G0803500,OS10G0419400,OS04G0447700,OS07G0635…
GO:BP	detoxification	GO:0098754	7.36108e-05	4.13305819616365	314	205	12	0.0585366	36851	OS06G0695200,OS06G0695300,OS03G0643700,OS07G0638400,OS03G0369000,OS07G0531400,OS09G0367700,OS07G0190800,OS03G0368300,OS03G0405500,OS03G0405900,OS03G0219200
GO:BP	response to toxic substance	GO:0009636	0.00020828	3.681353337926197	360	205	12	0.0585366	36851	OS06G0695200,OS06G0695300,OS03G0643700,OS07G0638400,OS03G0369000,OS07G0531400,OS09G0367700,OS07G0190800,OS03G0368300,OS03G0405500,OS03G0405900,OS03G0219200
GO:BP	cellular detoxification	GO:1990748	0.000336327	3.473237740406042	270	205	10	0.0487805	36851	OS06G0695200,OS06G0695300,OS07G0638400,OS03G0369000,OS07G0531400,OS07G0190800,OS03G0368300,OS03G0405500,OS03G0405900,OS03G0219200
GO:BP	cellular oxidant detoxification	GO:0098869	0.000336327	3.473237740406042	268	205	10	0.0487805	36851	OS06G0695200,OS06G0695300,OS07G0638400,OS03G0369000,OS07G0531400,OS07G0190800,OS03G0368300,OS03G0405500,OS03G0405900,OS03G0219200
GO:BP	cellular response to toxic substance	GO:0097237	0.000336327	3.473237740406042	270	205	10	0.0487805	36851	OS06G0695200,OS06G0695300,OS07G0638400,OS03G0369000,OS07G0531400,OS07G0190800,OS03G0368300,OS03G0405500,OS03G0405900,OS03G0219200
GO:BP	cofactor metabolic process	GO:0051186	0.000574954	3.240367226546057	672	205	15	0.0731707	36851	OS03G0595600,OS06G0695200,OS06G0695300,OS03G0643700,OS07G0638400,OS03G0369000,OS07G0531400,OS09G0367700,OS03G0368300,OS01G0667200,OS01G0147900,OS01G0369700,OS01G0371500,OS02G0601300,OS04G0674400
GO:BP	sulfur compound metabolic process	GO:0006790	0.00075704	3.120881451131	306	205	10	0.0487805	36851	OS03G0595600,OS03G0643700,OS09G0367700,OS04G0345800,OS12G0442800,OS10G0419400,OS01G0667200,OS01G0369700,OS01G0371500,OS04G0674400
GO:BP	glutathione metabolic process	GO:0006749	0.00370739	2.4309311999517123	117	205	6	0.0292683	36851	OS03G0595600,OS03G0643700,OS09G0367700,OS01G0667200,OS01G0369700,OS01G0371500
GO:BP	cellular modified amino acid metabolic process	GO:0006575	0.00372705	2.428634281138319	174	205	7	0.0341463	36851	OS03G0595600,OS03G0643700,OS09G0367700,OS03G0803500,OS01G0667200,OS01G0369700,OS01G0371500
GO:BP	reactive oxygen species metabolic process	GO:0072593	0.00524919	2.279907531544309	188	205	7	0.0341463	36851	OS06G0695200,OS06G0695300,OS07G0638400,OS03G0369000,OS07G0531400,OS03G0368300,OS03G0219200
GO:BP	drug metabolic process	GO:0017144	0.00524919	2.279907531544309	763	205	14	0.0682927	36851	OS05G0247800,OS06G0695200,OS06G0695300,OS07G0638400,OS03G0369000,OS07G0531400,OS04G0345800,OS10G0419400,OS03G0368300,OS01G0667200,OS05G0247100,OS01G0147900,OS02G0601300,OS10G0184300
GO:BP	response to oxidative stress	GO:0006979	0.00524919	2.279907531544309	328	205	9	0.0439024	36851	OS06G0695200,OS06G0695300,OS07G0638400,OS03G0369000,OS07G0531400,OS03G0437200,OS07G0190800,OS03G0368300,OS03G0219200
GO:BP	carboxylic acid biosynthetic process	GO:0046394	0.00591761	2.227853434964839	529	205	11	0.0536585	36851	OS03G0195100,OS04G0345800,OS05G0560900,OS05G0158600,OS06G0216300,OS03G0850400,OS10G0419400,OS06G0598800,OS01G0147900,OS03G0157900,OS02G0601300
GO:BP	response to chemical	GO:0042221	0.00591761	2.227853434964839	1410	205	20	0.097561	36851	OS06G0695200,OS09G0417800,OS03G0195100,OS06G0695300,OS09G0417600,OS03G0643700,OS07G0638400,OS03G0369000,OS07G0531400,OS09G0367700,OS03G0437200,OS07G0190800,OS03G0276500,OS03G0815100,OS04G0641700,OS03G0368300,OS03G0405500,OS03G0405900,OS06G0591600,OS03G0219200
GO:BP	hydrogen peroxide catabolic process	GO:0042744	0.00591761	2.227853434964839	146	205	6	0.0292683	36851	OS06G0695200,OS06G0695300,OS07G0638400,OS03G0369000,OS07G0531400,OS03G0368300
GO:BP	cellular homeostasis	GO:0019725	0.00591761	2.227853434964839	357	205	9	0.0439024	36851	OS07G0638400,OS02G0584700,OS07G0190800,OS03G0405500,OS03G0405900,OS01G0194600,OS01G0266500,OS03G0152000,OS10G0184300
GO:BP	antibiotic catabolic process	GO:0017001	0.00591761	2.227853434964839	149	205	6	0.0292683	36851	OS06G0695200,OS06G0695300,OS07G0638400,OS03G0369000,OS07G0531400,OS03G0368300
GO:BP	organic acid biosynthetic process	GO:0016053	0.00591761	2.227853434964839	529	205	11	0.0536585	36851	OS03G0195100,OS04G0345800,OS05G0560900,OS05G0158600,OS06G0216300,OS03G0850400,OS10G0419400,OS06G0598800,OS01G0147900,OS03G0157900,OS02G0601300
GO:BP	cell redox homeostasis	GO:0045454	0.00591761	2.227853434964839	144	205	6	0.0292683	36851	OS07G0638400,OS07G0190800,OS03G0405500,OS03G0405900,OS01G0194600,OS01G0266500
GO:BP	hydrogen peroxide metabolic process	GO:0042743	0.00591761	2.227853434964839	151	205	6	0.0292683	36851	OS06G0695200,OS06G0695300,OS07G0638400,OS03G0369000,OS07G0531400,OS03G0368300
GO:BP	metabolic process	GO:0008152	0.00591761	2.227853434964839	13778	205	102	0.497561	36851	OS04G0612700,OS06G0104900,OS02G0811800,OS02G0808800,OS08G0424100,OS09G0471000,OS05G0247800,OS01G0127000,OS03G0595600,OS08G0480400,OS06G0105100,OS07G0674800,OS06G0695200,OS03G0655100,OS02G0318100,OS01G0313300,OS09G0417800,OS03G0195100,OS06G0695300,OS09G0417600,OS01G0595600,OS07G0251900,OS03G0643700,OS03G0643250,OS01G0895300,OS07G0638400,OS02G0807900,OS03G0369000,OS07G0531400,OS12G0617400,OS05G0244…
GO:BP	drug catabolic process	GO:0042737	0.00591761	2.227853434964839	285	205	8	0.0390244	36851	OS05G0247800,OS06G0695200,OS06G0695300,OS07G0638400,OS03G0369000,OS07G0531400,OS03G0368300,OS05G0247100
GO:BP	response to stress	GO:0006950	0.00634613	2.1974907875908913	2073	205	25	0.121951	36851	OS02G0808800,OS11G0212000,OS06G0695200,OS01G0508100,OS09G0417800,OS03G0195100,OS06G0695300,OS07G0638400,OS03G0369000,OS07G0531400,OS01G0508500,OS12G0500500,OS01G0699600,OS03G0437200,OS12G0437800,OS07G0190800,OS03G0276500,OS03G0815100,OS03G0368300,OS02G0629800,OS01G0667200,OS03G0310800,OS01G0803200,OS06G0591600,OS03G0219200
GO:BP	response to stimulus	GO:0050896	0.00688279	2.1622353148162565	3942	205	39	0.190244	36851	OS02G0808800,OS11G0212000,OS06G0695200,OS01G0508100,OS09G0417800,OS03G0195100,OS06G0695300,OS09G0417600,OS03G0643700,OS03G0643250,OS07G0124100,OS07G0638400,OS02G0807900,OS03G0369000,OS07G0531400,OS09G0367700,OS01G0508500,OS12G0500500,OS01G0699600,OS04G0370900,OS05G0560900,OS03G0437200,OS05G0158600,OS12G0437800,OS07G0190800,OS03G0276500,OS03G0815100,OS11G0694100,OS04G0641700,OS06G0293500,OS03G0368…
GO:BP	cofactor catabolic process	GO:0051187	0.00986541	2.005884734228339	170	205	6	0.0292683	36851	OS06G0695200,OS06G0695300,OS07G0638400,OS03G0369000,OS07G0531400,OS03G0368300
GO:BP	small molecule biosynthetic process	GO:0044283	0.0119016	1.9243941990000235	688	205	12	0.0585366	36851	OS03G0195100,OS10G0204400,OS04G0345800,OS05G0560900,OS05G0158600,OS06G0216300,OS03G0850400,OS10G0419400,OS06G0598800,OS01G0147900,OS03G0157900,OS02G0601300
GO:BP	systemic acquired resistance	GO:0009627	0.0119016	1.9243941990000235	28	205	3	0.0146341	36851	OS01G0508100,OS03G0195100,OS01G0508500
GO:BP	small molecule metabolic process	GO:0044281	0.0125098	1.90275087336714	1580	205	20	0.097561	36851	OS06G0104900,OS08G0424100,OS03G0195100,OS10G0204400,OS04G0345800,OS05G0560900,OS05G0158600,OS09G0526700,OS06G0216300,OS07G0190800,OS12G0442800,OS03G0850400,OS03G0803500,OS10G0419400,OS05G0161800,OS06G0598800,OS01G0147900,OS03G0157900,OS02G0601300,OS10G0184300
GO:BP	lignin biosynthetic process	GO:0009809	0.0132962	1.8762727644169332	30	205	3	0.0146341	36851	OS04G0612700,OS02G0811800,OS02G0808800
GO:BP	oxoacid metabolic process	GO:0043436	0.0194192	1.7117692539589222	956	205	14	0.0682927	36851	OS06G0104900,OS03G0195100,OS04G0345800,OS05G0560900,OS05G0158600,OS06G0216300,OS12G0442800,OS03G0850400,OS03G0803500,OS10G0419400,OS06G0598800,OS01G0147900,OS03G0157900,OS02G0601300
GO:BP	regulation of systemic acquired resistance	GO:0010112	0.0194192	1.7117692539589222	9	205	2	0.0097561	36851	OS01G0508100,OS01G0508500
GO:BP	response to antibiotic	GO:0046677	0.0194192	1.7117692539589222	78	205	4	0.0195122	36851	OS09G0417800,OS03G0195100,OS09G0417600,OS03G0219200
GO:BP	response to salicylic acid	GO:0009751	0.0194192	1.7117692539589222	36	205	3	0.0146341	36851	OS09G0417800,OS03G0195100,OS09G0417600
GO:BP	regulation of response to biotic stimulus	GO:0002831	0.0194192	1.7117692539589222	36	205	3	0.0146341	36851	OS01G0508100,OS09G0417800,OS01G0508500
GO:BP	organic acid metabolic process	GO:0006082	0.0194192	1.7117692539589222	958	205	14	0.0682927	36851	OS06G0104900,OS03G0195100,OS04G0345800,OS05G0560900,OS05G0158600,OS06G0216300,OS12G0442800,OS03G0850400,OS03G0803500,OS10G0419400,OS06G0598800,OS01G0147900,OS03G0157900,OS02G0601300
GO:BP	amino acid salvage	GO:0043102	0.0201352	1.6960431938892753	10	205	2	0.0097561	36851	OS04G0345800,OS10G0419400
GO:BP	regulation of response to external stimulus	GO:0032101	0.0201352	1.6960431938892753	38	205	3	0.0146341	36851	OS01G0508100,OS09G0417800,OS01G0508500
GO:BP	gibberellin catabolic process	GO:0045487	0.0201352	1.6960431938892753	10	205	2	0.0097561	36851	OS05G0560900,OS05G0158600
GO:BP	L-methionine salvage from methylthioadenosine	GO:0019509	0.0201352	1.6960431938892753	10	205	2	0.0097561	36851	OS04G0345800,OS10G0419400
GO:BP	regulation of biological quality	GO:0065008	0.0201352	1.6960431938892753	986	205	14	0.0682927	36851	OS07G0638400,OS05G0560900,OS02G0584700,OS05G0158600,OS06G0216300,OS07G0190800,OS03G0405500,OS02G0629800,OS03G0405900,OS01G0194600,OS01G0266500,OS03G0152000,OS03G0302000,OS10G0184300
GO:BP	diterpenoid catabolic process	GO:0016103	0.0201352	1.6960431938892753	10	205	2	0.0097561	36851	OS05G0560900,OS05G0158600
GO:BP	cellular response to chemical stimulus	GO:0070887	0.0201352	1.6960431938892753	773	205	12	0.0585366	36851	OS06G0695200,OS03G0195100,OS06G0695300,OS07G0638400,OS03G0369000,OS07G0531400,OS07G0190800,OS03G0276500,OS03G0368300,OS03G0405500,OS03G0405900,OS03G0219200
GO:BP	L-methionine salvage	GO:0071267	0.0201352	1.6960431938892753	10	205	2	0.0097561	36851	OS04G0345800,OS10G0419400
GO:BP	homeostatic process	GO:0042592	0.0201352	1.6960431938892753	567	205	10	0.0487805	36851	OS07G0638400,OS02G0584700,OS07G0190800,OS03G0405500,OS02G0629800,OS03G0405900,OS01G0194600,OS01G0266500,OS03G0152000,OS10G0184300
GO:BP	regulation of multi-organism process	GO:0043900	0.020257	1.6934255475494984	40	205	3	0.0146341	36851	OS01G0508100,OS09G0417800,OS01G0508500
GO:BP	carboxylic acid metabolic process	GO:0019752	0.0288407	1.539993490895983	922	205	13	0.0634146	36851	OS06G0104900,OS03G0195100,OS04G0345800,OS05G0560900,OS05G0158600,OS06G0216300,OS03G0850400,OS03G0803500,OS10G0419400,OS06G0598800,OS01G0147900,OS03G0157900,OS02G0601300
GO:BP	response to organic cyclic compound	GO:0014070	0.0290107	1.537442132754562	97	205	4	0.0195122	36851	OS09G0417800,OS03G0195100,OS09G0417600,OS04G0641700
GO:BP	response to chitin	GO:0010200	0.0292676	1.533612558198704	13	205	2	0.0097561	36851	OS09G0417800,OS09G0417600
GO:BP	L-methionine biosynthetic process	GO:0071265	0.0292676	1.533612558198704	13	205	2	0.0097561	36851	OS04G0345800,OS10G0419400
GO:BP	defense response, incompatible interaction	GO:0009814	0.0292676	1.533612558198704	47	205	3	0.0146341	36851	OS01G0508100,OS03G0195100,OS01G0508500
GO:BP	aspartate family amino acid biosynthetic process	GO:0009067	0.0315465	1.5010484381863085	49	205	3	0.0146341	36851	OS04G0345800,OS03G0850400,OS10G0419400
GO:BP	terpenoid catabolic process	GO:0016115	0.0315465	1.5010484381863085	14	205	2	0.0097561	36851	OS05G0560900,OS05G0158600
GO:BP	hormone catabolic process	GO:0042447	0.0315465	1.5010484381863085	14	205	2	0.0097561	36851	OS05G0560900,OS05G0158600
GO:BP	antibiotic metabolic process	GO:0016999	0.0315465	1.5010484381863085	246	205	6	0.0292683	36851	OS06G0695200,OS06G0695300,OS07G0638400,OS03G0369000,OS07G0531400,OS03G0368300
GO:BP	secondary metabolic process	GO:0019748	0.0344375	1.4629680536981482	338	205	7	0.0341463	36851	OS04G0612700,OS02G0811800,OS02G0808800,OS03G0643700,OS09G0367700,OS09G0441400,OS01G0667200
GO:BP	toxin metabolic process	GO:0009404	0.0367619	1.43460187230559	53	205	3	0.0146341	36851	OS03G0643700,OS09G0367700,OS01G0667200
GO:BP	cellular response to antibiotic	GO:0071236	0.0387948	1.4112267123899311	16	205	2	0.0097561	36851	OS03G0195100,OS03G0219200
GO:BP	biological_process	GO:0008150	0.0387948	1.4112267123899311	17854	205	119	0.580488	36851	OS04G0612700,OS03G0282100,OS06G0104900,OS02G0811800,OS02G0808800,OS08G0424100,OS09G0471000,OS11G0212000,OS05G0247800,OS01G0127000,OS03G0595600,OS08G0480400,OS06G0105100,OS07G0674800,OS06G0695200,OS03G0655100,OS02G0318100,OS01G0508100,OS01G0313300,OS09G0417800,OS03G0195100,OS06G0695300,OS09G0417600,OS01G0595600,OS07G0251900,OS03G0643700,OS01G0905300,OS03G0643250,OS01G0895300,OS07G0124100,OS07G0638…
GO:BP	phenylpropanoid biosynthetic process	GO:0009699	0.0387948	1.4112267123899311	55	205	3	0.0146341	36851	OS04G0612700,OS02G0811800,OS02G0808800
GO:BP	lignin metabolic process	GO:0009808	0.0443363	1.3532401979211213	58	205	3	0.0146341	36851	OS04G0612700,OS02G0811800,OS02G0808800
GO:BP	glucose metabolic process	GO:0006006	0.0457718	1.339401590695783	59	205	3	0.0146341	36851	OS10G0204400,OS01G0147900,OS02G0601300
GO:BP	aspartate family amino acid metabolic process	GO:0009066	0.047224	1.3258370964405501	60	205	3	0.0146341	36851	OS04G0345800,OS03G0850400,OS10G0419400
